# Supplementary material for: Solution- and gas-phase study of binding of ammonium and bisammonium hydrocarbons to oxacalix[4]arene carboxylate
Source: Royal Society of Chemistry journal article supplement (doi:10.1039/d2ra07614d), 2023-01-01
Supplement: d2ra07614d1.pdf [file d2ra07614d1.pdf]

## Electronic Supplementary Information

# Solution- and Gas-Phase Study of Binding of Ammonium and Bisammonium Hydrocarbons with Oxacalix[4]arene Carboxylate

Anna Cowart,<sup>‡a,b</sup> Mari-Liis Brük,<sup>‡a,b</sup> Nikita Žoglo,<sup>a</sup> Helena Roithmeyer,<sup>a</sup> Merle Uudsemaa,<sup>a</sup> Aleksander Trummal,<sup>a</sup> Kaspar Selke,<sup>a</sup> Riina Aav,<sup>b</sup> Elina Kalenius,<sup>c</sup> and Jasper Adamson\*<sup>a</sup>

<sup>a</sup> Laboratory of Chemical Physics, National Institute of Chemical Physics and Biophysics, Akadeemia tee 23, 12618 Tallinn, Estonia, E-mail: jasper.adamson@kbfi.ee

<sup>b</sup> Department of Chemistry and Biotechnology, Tallinn University of Technology, Akadeemia tee 15, 12618 Tallinn, Estonia

<sup>c</sup> Department of Chemistry, NanoScience Center, University of Jyväskylä, Survantie 9B, FI-40014 JY, Finland

<sup>‡</sup> These authors contribute equally to this work.

## Table of contents

|                                                                                                                                                      |     |
|------------------------------------------------------------------------------------------------------------------------------------------------------|-----|
| <b>NMR titration</b> .....                                                                                                                           | S4  |
| <b>Table S1.</b> Titration details and binding constants of 1:1 complexes of host <b>1</b> with guests <b>2-13</b> in methanol- $d_4$ at 298 K ..... | S4  |
| <b>Figure S1.</b> $^1\text{H}$ NMR titration data of host <b>1</b> and guest <b>2</b> complex in methanol- $d_4$ .....                               | S6  |
| <b>Figure S2.</b> $^1\text{H}$ NMR titration data of host <b>1</b> and guest <b>3</b> complex in methanol- $d_4$ .....                               | S7  |
| <b>Figure S3.</b> $^1\text{H}$ NMR titration data of host <b>1</b> and guest <b>4</b> complex in methanol- $d_4$ .....                               | S8  |
| <b>Figure S4.</b> $^1\text{H}$ NMR titration data of host <b>1</b> and guest <b>6</b> complex in methanol- $d_4$ .....                               | S9  |
| <b>Figure S5.</b> $^1\text{H}$ NMR titration data of host <b>1</b> and guest <b>7</b> complex in methanol- $d_4$ .....                               | S10 |
| <b>Figure S6.</b> $^1\text{H}$ NMR titration data of host <b>1</b> and guest <b>8</b> complex in methanol- $d_4$ .....                               | S11 |
| <b>Figure S7.</b> $^1\text{H}$ NMR titration data of host <b>1</b> and guest <b>9</b> complex in methanol- $d_4$ .....                               | S12 |
| <b>Figure S8.</b> $^1\text{H}$ NMR titration data of host <b>1</b> and guest <b>10</b> complex in methanol- $d_4$ .....                              | S13 |
| <b>Figure S9.</b> $^1\text{H}$ NMR titration data of host <b>1</b> and guest <b>11</b> complex in methanol- $d_4$ .....                              | S14 |
| <b>Figure S10.</b> $^1\text{H}$ NMR titration data of host <b>1</b> and guest <b>12</b> complex in methanol- $d_4$ .....                             | S15 |
| <b>Figure S11.</b> $^1\text{H}$ NMR titration data of host <b>1</b> and guest <b>13</b> complex in methanol- $d_4$ .....                             | S16 |
| <b>Figure S12.</b> $^1\text{H}$ NMR titration data of host <b>1</b> and guest <b>14</b> complex in methanol- $d_4$ .....                             | S17 |
| <b>Figure S13.</b> $^1\text{H}$ NMR titration data of host <b>1</b> added nitrobenzene <b>15</b> in methanol- $d_4$ .....                            | S18 |
| <b>Figure S14.</b> $^1\text{H}$ NMR titration data of host <b>1</b> and guest <b>16</b> complex in methanol- $d_4$ .....                             | S19 |
| <b>Figure S15.</b> $^1\text{H}$ NMR titration data of host <b>1</b> and guest <b>17</b> complex in methanol- $d_4$ .....                             | S20 |
| <b>Figure S16.</b> $^1\text{H}$ NMR titration data of host <b>1</b> and guest <b>18</b> complex in methanol- $d_4$ .....                             | S21 |
| <b>Figure S17.</b> $^1\text{H}$ NMR titration data of host <b>1</b> and guest <b>19</b> complex in methanol- $d_4$ .....                             | S22 |
| <b>Figure S18.</b> $^1\text{H}$ NMR titration data of host <b>1</b> and guest <b>20</b> complex in methanol- $d_4$ .....                             | S23 |
| <b>Figure S19.</b> $^1\text{H}$ NMR titration data of host <b>1</b> and guest <b>21</b> complex in methanol- $d_4$ .....                             | S24 |
| <b>Figure S20.</b> $^1\text{H}$ NMR titration data of 2,6-dimethoxybenzoic acid and guest <b>2</b> complex in methanol- $d_4$ .....                  | S25 |
| <b>Figure S21.</b> $^1\text{H}$ NMR titration data of host 2,6-dimethoxybenzoic acid and guest <b>11</b> complex in methanol- $d_4$ .....            | S26 |
| <b>Figure S22.</b> $^1\text{H}$ NMR titration data of host 2,6-dimethoxybenzoic acid and guest <b>12</b> complex in methanol- $d_4$ .....            | S27 |
| <b>ESI-MS</b> .....                                                                                                                                  | S28 |
| <b>Figure S23.</b> (-)ESI-MS spectrum of host <b>1</b> in acetonitrile. Inset shows zoomed view for isotopic distribution. ....                      | S28 |
| <b>Figure S24.</b> (+)ESI-MS spectrum of host <b>1</b> in acetonitrile .....                                                                         | S28 |
| <b>Figure S25.</b> (+)ESI-MS spectrum 1:1 mixture of host <b>1</b> with guest <b>2</b> . ....                                                        | S28 |
| <b>Figure S26.</b> (+)ESI-MS spectrum 1:1 mixture of host <b>1</b> with guest <b>3</b> . ....                                                        | S29 |

|                                                                                                                                                      |     |
|------------------------------------------------------------------------------------------------------------------------------------------------------|-----|
| <b>Figure S27.</b> (+)ESI-MS spectrum 1:1 mixture of host <b>1</b> with guest <b>5</b> . .....                                                       | S29 |
| <b>Figure S28.</b> (+)ESI-MS spectrum 1:1 mixture of host <b>1</b> with guest <b>6</b> . .....                                                       | S29 |
| <b>Figure S29.</b> (+)ESI-MS spectrum 1:1 mixture of host <b>1</b> with guest <b>7</b> . .....                                                       | S30 |
| <b>Figure S30.</b> (+)ESI-MS spectrum 1:1 mixture of host <b>1</b> with guest <b>10</b> . .....                                                      | S30 |
| <b>Figure S31.</b> (+)ESI-MS spectrum 1:1 mixture of host <b>1</b> with guest <b>11</b> . .....                                                      | S30 |
| <b>Figure S32.</b> (+)ESI-MS spectrum 1:1 mixture of host <b>1</b> with guest <b>12</b> . .....                                                      | S31 |
| Ion mobility mass spectrometry .....                                                                                                                 | S31 |
| <b>Table S2.</b> (+)ESI-MS detected ions of [ <b>1</b> + guest] <sup>+</sup> 1:1 complexes in acetonitrile with their corresponding CCS values. .... | S31 |
| <b>DFT calculations</b> .....                                                                                                                        | S32 |
| Molecular Cartesian coordinates of the [ <b>1+8</b> ] <sup>+</sup> host-guest complex in MeOH (Å) .....                                              | S33 |
| Molecular Cartesian coordinates of the [ <b>1+11</b> ] <sup>+</sup> host-guest complex in MeOH (Å) .....                                             | S34 |
| Molecular Cartesian coordinates of the [ <b>1+12</b> ] <sup>+</sup> host-guest complex in MeOH (Å) .....                                             | S35 |
| Molecular Cartesian coordinates of the [ <b>1+2</b> ] <sup>+</sup> host-guest complex (Å).....                                                       | S36 |
| Molecular Cartesian coordinates of the [ <b>1+3</b> ] <sup>+</sup> host-guest complex (Å).....                                                       | S37 |
| Molecular Cartesian coordinates of the [ <b>1+11</b> ] <sup>+</sup> host-guest complex (Å).....                                                      | S38 |
| Molecular Cartesian coordinates of the [ <b>1+12</b> ] <sup>+</sup> host-guest complex (Å).....                                                      | S39 |
| <b>References</b> .....                                                                                                                              | S42 |

### NMR titration

Stepwise association constants were evaluated using (Bindfit) online tools at [supramolecular.org](http://supramolecular.org).<sup>1,2</sup> The 1:2 NMR binding model with "full flavor" was used in Bindfit, which does not assume any specific relation: (i) between chemical shifts of HG and HG<sub>2</sub>; (ii) between stepwise association constants ( $K_{11}$ ,  $K_{12}$ ). Cooperativity was expressed as  $\alpha = 4K_{12}/K_{11}$ .<sup>2</sup>

**Table S1.** Titration data points and binding constants of 1:2 complexes of host **1** with guests **2-13** (entry 1-12) and molecule **22** with guests **2**, **11** and **12** (entry 13, 14 and 15 and marked with an asterisks) in methanol-*d*<sub>4</sub> at 298 K.

| Entry | Guest     | $K_a$ (M <sup>-1</sup> )                    | Data points fitted |
|-------|-----------|---------------------------------------------|--------------------|
| 1     | <b>2</b>  | $K_{11}$ 167.1 ± 1.7<br>$K_{12}$ 15.9 ± 0.1 | 64                 |
| 2     | <b>3</b>  | $K_{11}$ 97.1 ± 0.9<br>$K_{12}$ 5.67 ± 0.05 | 76                 |
| 3     | <b>4</b>  | $K_{11}$ 105 ± 1<br>$K_{12}$ 7.2 ± 0.1      | 76                 |
| 4     | <b>6</b>  | $K_{11}$ 103 ± 2<br>$K_{12}$ 5.6 ± 0.1      | 57                 |
| 5     | <b>7</b>  | $K_{11}$ 46 ± 2<br>$K_{12}$ 3.3 ± 0.1       | 72                 |
| 6     | <b>8</b>  | Proton transfer to host                     |                    |
| 7     | <b>9</b>  | Proton transfer to host                     |                    |
| 8     | <b>10</b> | Proton transfer to host                     |                    |
| 9     | <b>11</b> | $K_{11}$ 124 ± 1<br>$K_{12}$ 8.73 ± 0.08    | 76                 |

|    |            |                                              |    |
|----|------------|----------------------------------------------|----|
| 10 | <b>12</b>  | $K_{11} 818 \pm 30$<br>$K_{12} 104 \pm 5$    | 72 |
| 11 | <b>13</b>  | $K_{11} 536 \pm 8$<br>$K_{12} 31.4 \pm 0.5$  | 76 |
| 12 | <b>14</b>  | $K_{11} 113 \pm 2$<br>$K_{12} 3.13 \pm 0.08$ | 76 |
| 13 | <b>2*</b>  | $K_{11} 250 \pm 20$<br>$K_{12} 17 \pm 1$     | 68 |
| 14 | <b>11*</b> | $K_{11} 500 \pm 100$<br>$K_{12} 6.0 \pm 0.4$ | 76 |
| 15 | <b>12*</b> | $K_{11} 2000 \pm 200$<br>$K_{12} 100 \pm 7$  | 68 |

$^1\text{H}$  NMR titration data of host **1** and guest **2** complex in methanol- $d_4$

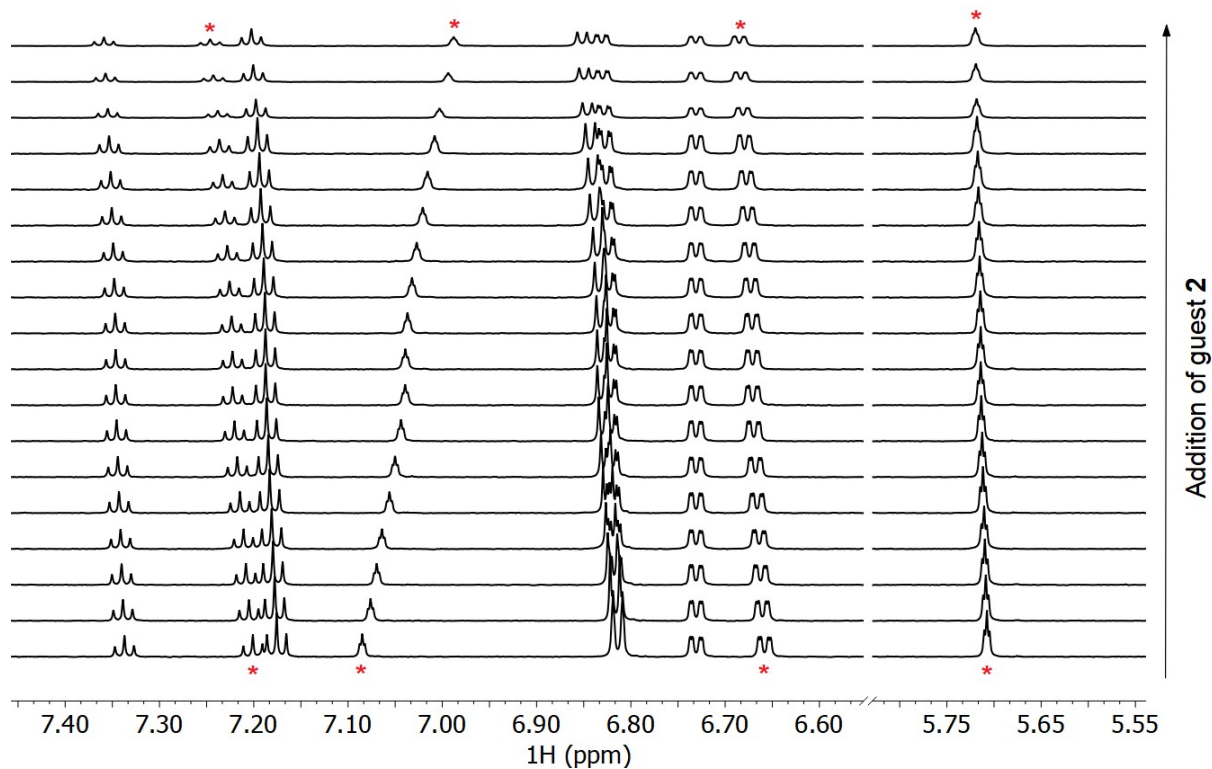

**Figure S1.**  $^1\text{H}$  NMR (methanol- $d_4$ , 800.13 MHz) spectra of **1** (0.7 mM) titration with **2** at 298 K. On the figure are shown the 18 titration points representing all the macrocycles' peaks with followed protons marked with asterisk (\*). Guest **2** concentration (M) in samples 0, 0.0013, 0.0026, 0.0040, 0.0065, 0.0090, 0.0120, 0.0145, 0.0147, 0.0165, 0.0203, 0.0255, 0.0338, 0.0417, 0.0581, 0.0740, 0.1120, 0.1437. The results of the  $K_a$  determination based on 16 titration points and 1:2 binding model of Bindfit are accessible at the following link: [Bindfit 1:2 binding model results](#)

$^1\text{H}$  NMR titration data of host **1** and guest **3** complex in methanol- $d_4$

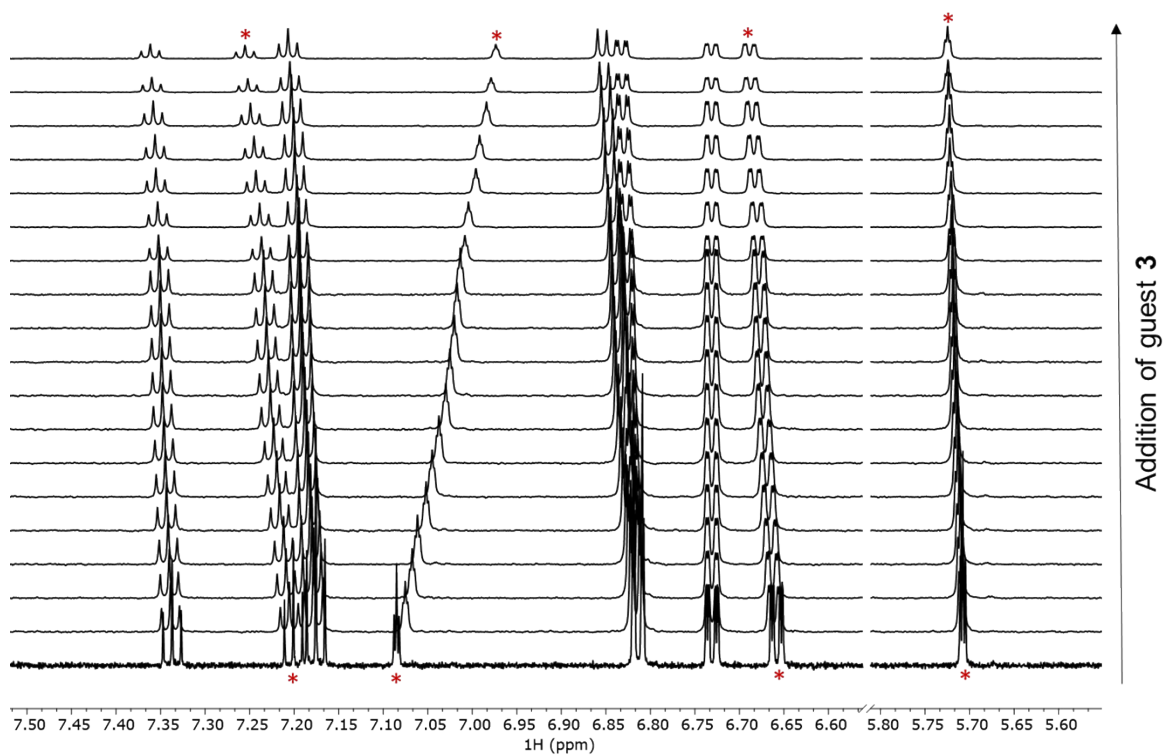

**Figure S2.**  $^1\text{H}$  NMR (methanol- $d_4$ , 800.13 MHz) spectra of **1** (0.7 mM) titration with **3** at 298 K. On the figure are shown the 19 titration points representing all the macrocycles' peaks with followed protons marked with asterisk (\*). Guest **3** concentration (M) in samples 0, 0.0017, 0.0034, 0.0052, 0.0087, 0.0119, 0.0172, 0.0232, 0.0281, 0.0349, 0.0397, 0.0455, 0.0570, 0.0663, 0.0962, 0.1158, 0.1594, 0.1966, 0.2555. The results of the  $K_a$  determination based on 1:2 binding model of Bindfit are accessible at the following link: [Bindfit 1:2 model results](#)

$^1\text{H}$  NMR titration data of host **1** and guest **4** complex in methanol- $d_4$

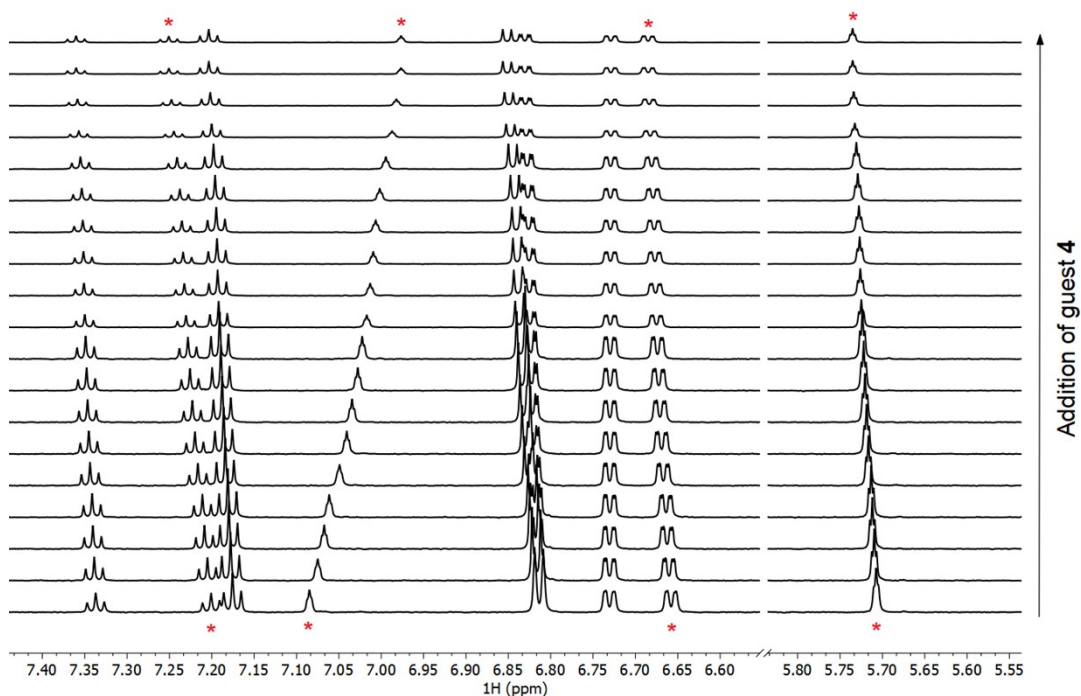

**Figure S3.**  $^1\text{H}$  NMR (methanol- $d_4$ , 800.13 MHz) spectra of **1** (0.7 mM) titration with **4** at 298 K. On the figure are shown the 19 titration points representing all the macrocycles' peaks with followed protons marked with asterisk (\*). Guest **4** concentration (M) in samples 0, 0.0018, 0.0036, 0.0054, 0.0103, 0.0150, 0.0200, 0.0262, 0.0326, 0.0413, 0.0496, 0.0551, 0.0626, 0.0760, 0.1014, 0.1407, 0.1758, 0.2256, 0.2284. The results of the  $K_a$  determination based on 1:2 binding model of Bindfit are accessible at the following link: [Bindfit 1:2 model results](#)



$^1\text{H}$  NMR titration data of host **1** and guest **6** complex in methanol- $d_4$

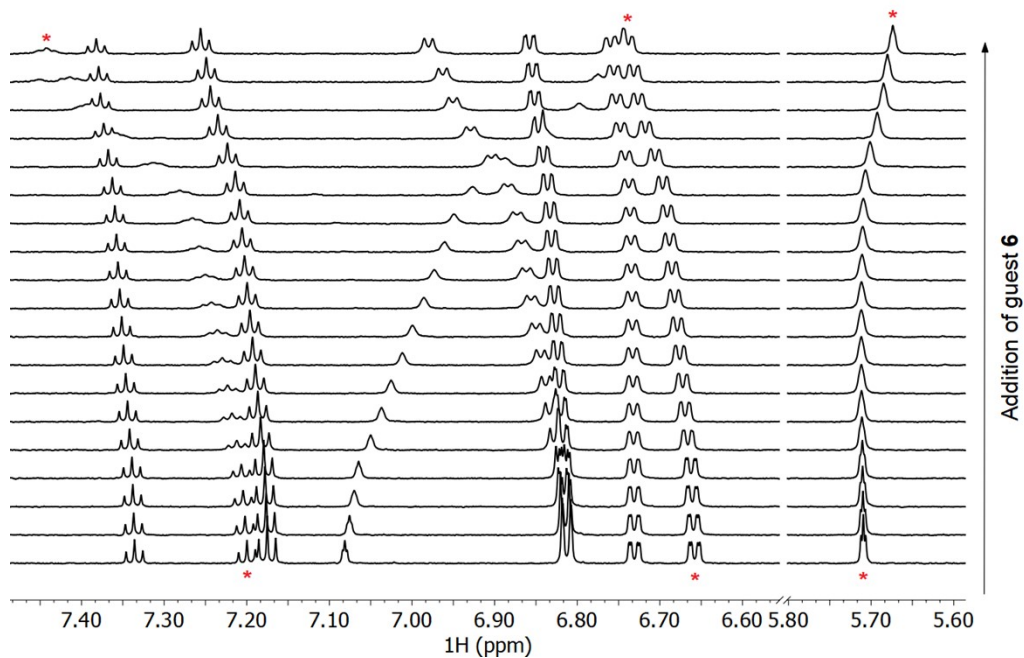

**Figure S4.**  $^1\text{H}$  NMR (methanol- $d_4$ , 800.13 MHz) spectra of **1** (0.2 mM) titration with **6** at 298 K. On the figure are shown the 19 titration points representing all the macrocycles' peaks with followed protons marked with asterisk (\*). Guest **6** concentration (M) in samples 0, 0.0003, 0.0006, 0.0010, 0.0019, 0.0029, 0.0038, 0.0049, 0.0064, 0.0078, 0.0093, 0.0106, 0.0125, 0.0152, 0.0203, 0.0279, 0.0360, 0.0395, 0.0475. The results of the  $K_a$  determination based on 1:2 binding model of Bindfit are accessible at the following link: [Bindfit 1:2 model results](#)

$^1\text{H}$  NMR titration data of host **1** and guest **7** complex in methanol- $d_4$

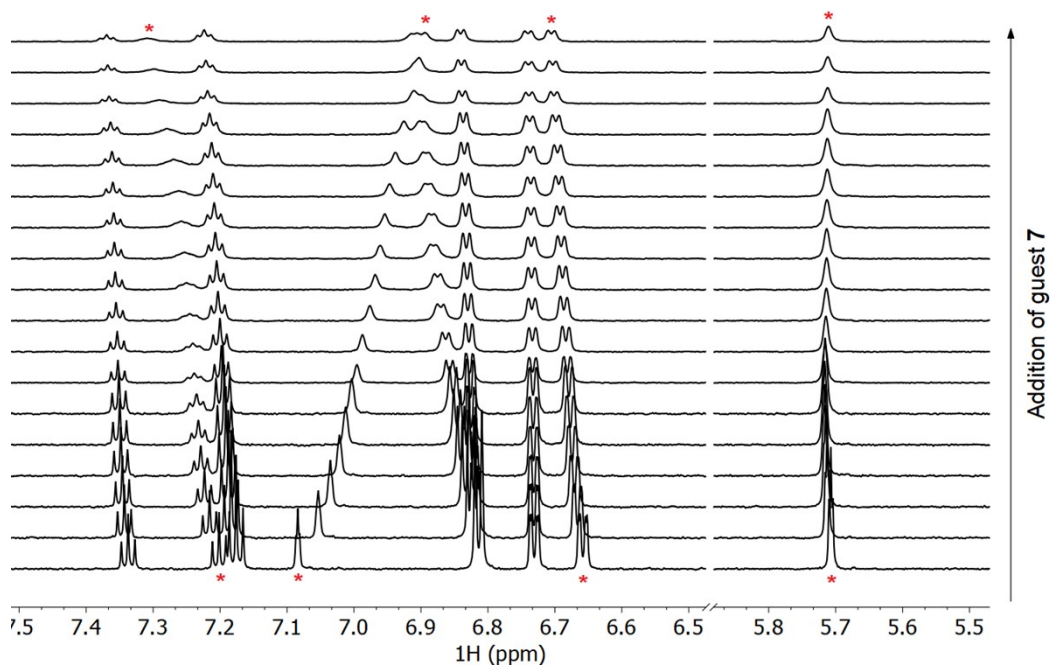

**Figure S5.**  $^1\text{H}$  NMR (methanol- $d_4$ , 800.13 MHz) spectra of **1** (0.7 mM) titration with **7** at 298 K. On the figure are shown the 18 titration points representing all the macrocycles' peaks with followed protons marked with asterisk (\*). Guest **7** concentration (M) in samples 0, 0.0057, 0.0112, 0.0167, 0.0221, 0.0274, 0.0302, 0.0379, 0.0455, 0.0527, 0.0608, 0.0665, 0.0732, 0.0839, 0.1121, 0.1469, 0.1782, 0.2096. The results of the  $K_a$  determination based on 1:1 binding model of Bindfit are accessible at the following link: [Bindfit 1:2 model results](#)

$^1\text{H}$  NMR titration data of host **1** and guest **8** complex in methanol- $d_4$

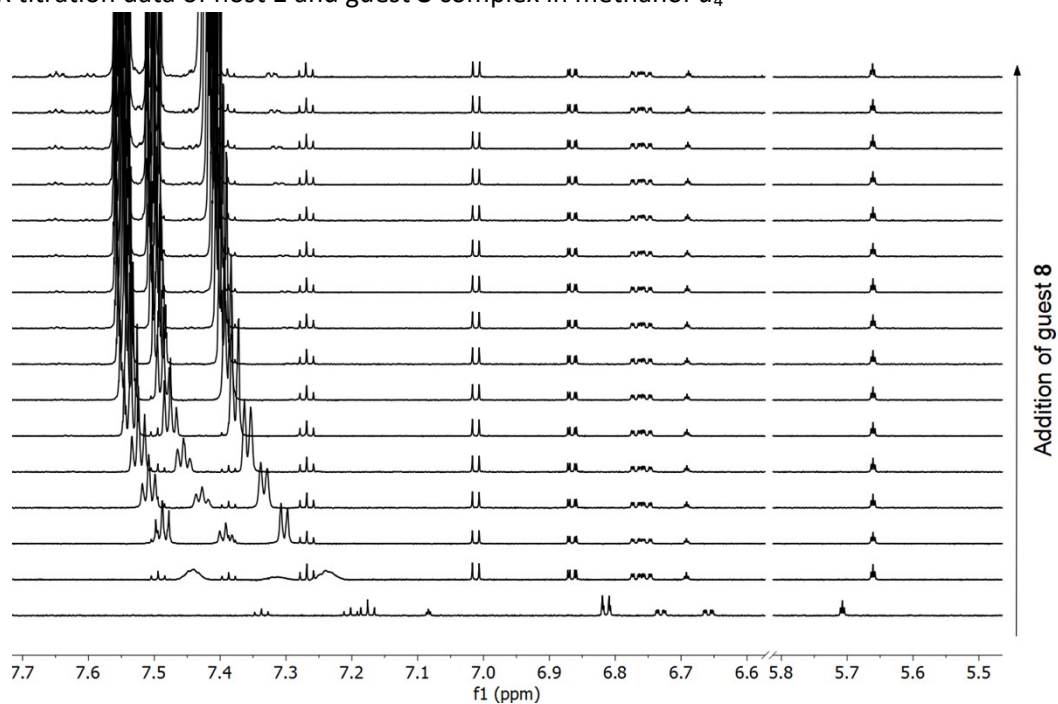

**Figure S6.**  $^1\text{H}$  NMR (methanol- $d_4$ , 800.13 MHz) spectra of **1** (1.0 mM) titration with **8** at 298 K. Guest **8** concentration (M) in samples 0, 0.001, 0.002, 0.003, 0.005, 0.007, 0.01, 0.0148, 0.0196, 0.0243, 0.0289, 0.0335, 0.0380, 0.0467, 0.0552, 0.0715, 0.0868, 0.1215, 0.1402.

$^1\text{H}$  NMR titration data of host **1** and guest **9** complex in methanol- $d_4$

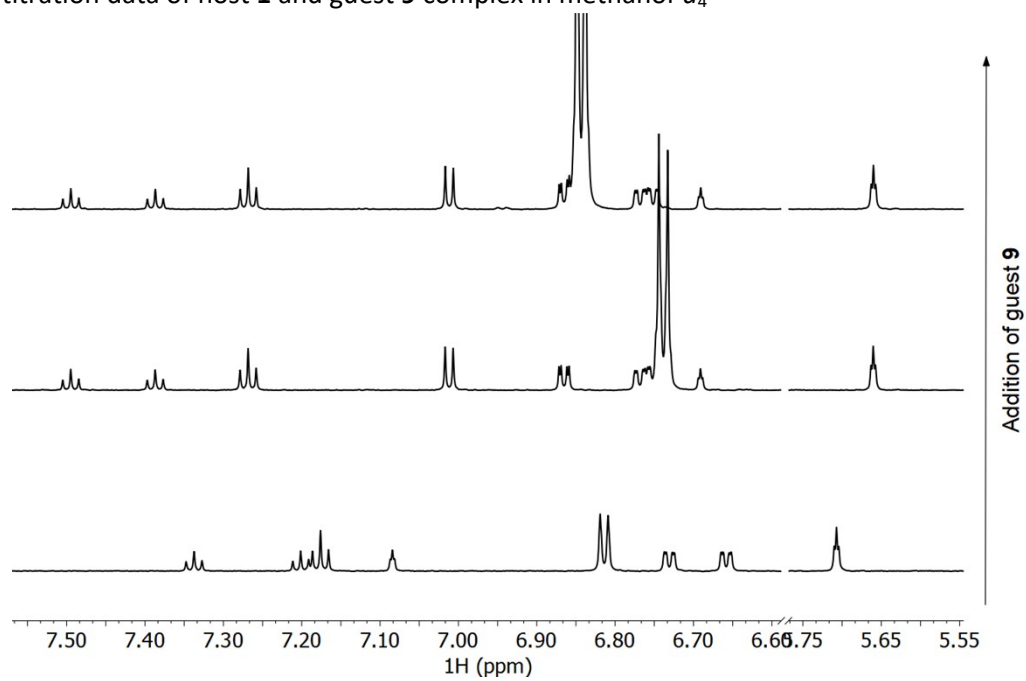

**Figure S7.**  $^1\text{H}$  NMR (methanol- $d_4$ , 800.13 MHz) spectra of **1** (0.7 mM) titration with **9** at 298 K. Guest **9** added to samples in 0, 1 and 2 equivalents.

$^1\text{H}$  NMR titration data of host **1** and guest **10** complex in methanol- $d_4$

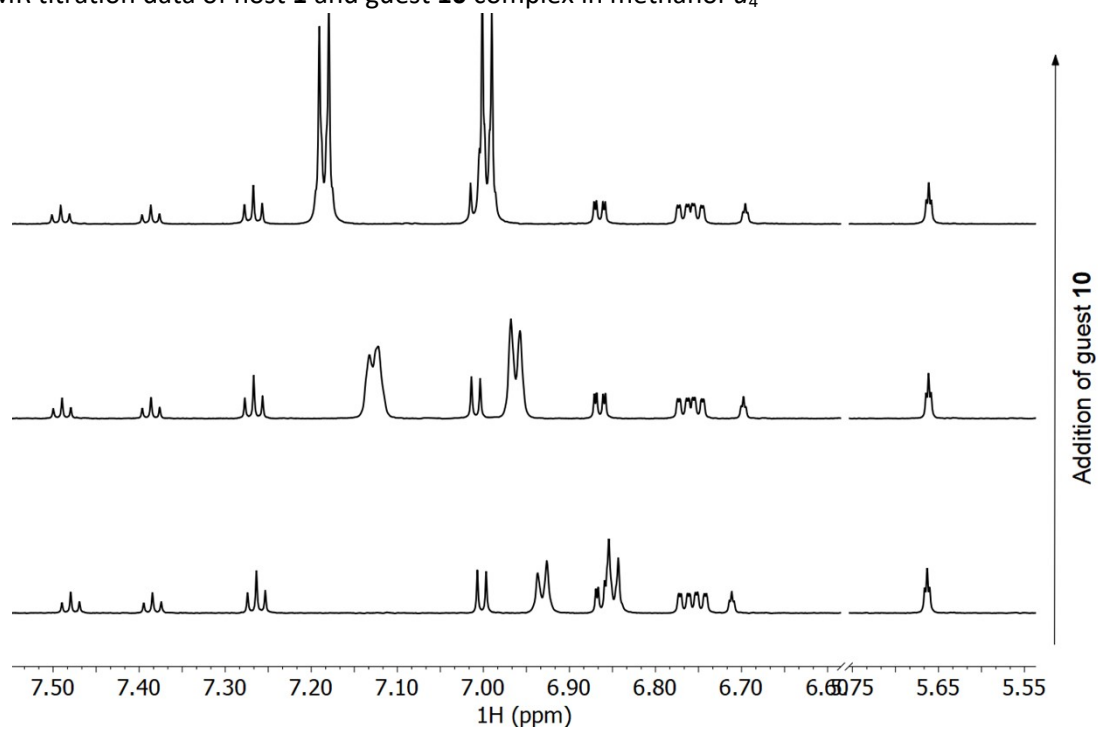

**Figure S8.**  $^1\text{H}$  NMR (methanol- $d_4$ , 800.13 MHz) spectra of **1** (0.7 mM) titration with **10** at 298 K. Guest **10** added to samples in 1.5, 3.1 and 4.5 equivalents.

$^1\text{H}$  NMR titration data of host **1** and guest **11** complex in methanol- $d_4$

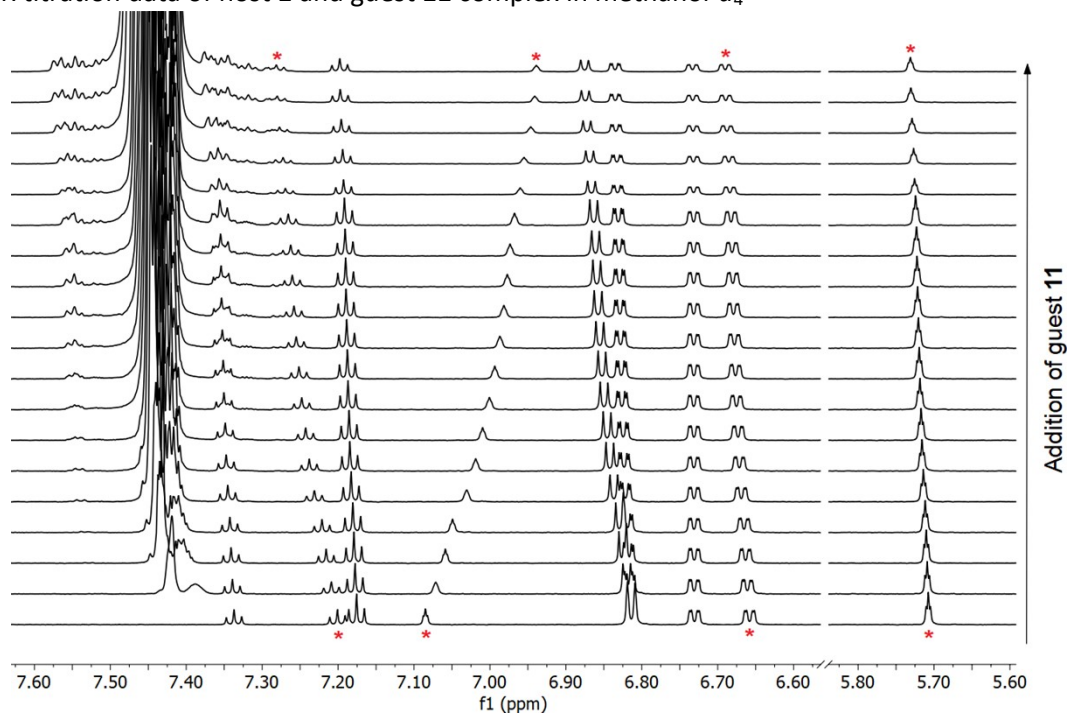

**Figure S9.**  $^1\text{H}$  NMR (methanol- $d_4$ , 800.13 MHz) spectra of **1** (0.6 mM) titration with **11** at 298 K. On the figure are shown the 19 titration points representing all the macrocycles' peaks with followed protons marked with asterisk (\*). Guest **11** concentration (M) in samples 0, 0.0013, 0.0029, 0.0044, 0.0084, 0.0124, 0.0166, 0.0211, 0.0262, 0.0336, 0.0387, 0.0455, 0.0511, 0.0633, 0.0805, 0.1006, 0.1417, 0.1773, 0.1968. The results of the  $K_a$  determination based on 1:2 binding model of Bindfit are accessible at the following link: [Bindfit 1:2 model results](#)

$^1\text{H}$  NMR titration data of host **1** and guest **12** complex in methanol- $d_4$

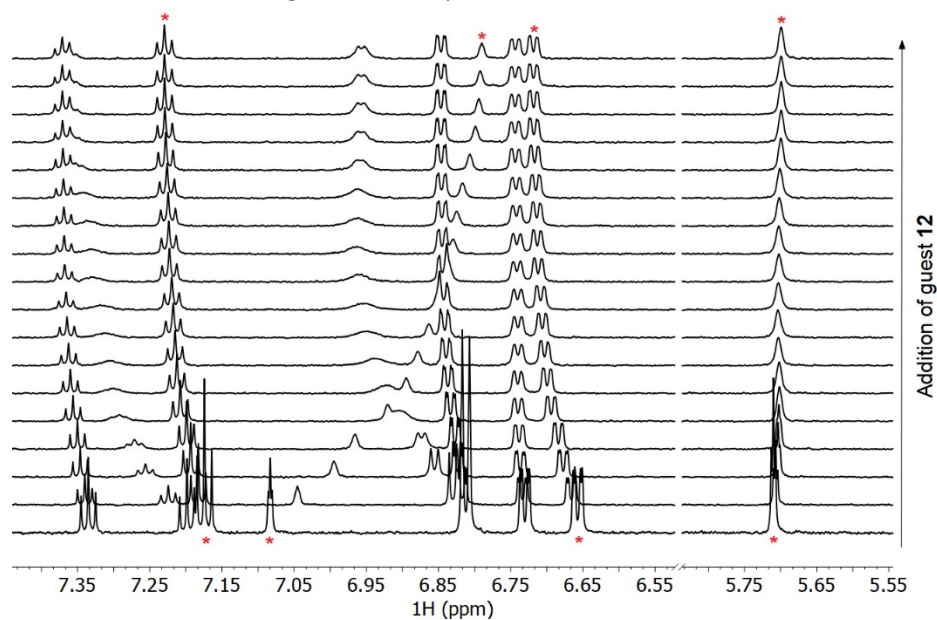

**Figure S10.**  $^1\text{H}$  NMR (methanol- $d_4$ , 800.13 MHz) spectra of **1** (0.2 mM) titration with **12** at 298 K. On the figure are shown the 18 titration points representing all the macrocycles' peaks with followed protons marked with asterisk (\*). Guest **12** concentration (M) in samples 0, 0.0003, 0.0009, 0.0013, 0.0026, 0.0038, 0.0053, 0.0068, 0.0084, 0.0124, 0.0143, 0.0166, 0.0204, 0.0286, 0.0386, 0.0478, 0.0546, 0.0590. The results of the  $K_a$  determination based on 13 titration points and 1:2 binding model of Bindfit are accessible at the following link: [Bindfit 1:2 model results](#)

$^1\text{H}$  NMR titration data of host **1** and guest **13** complex in methanol- $d_4$

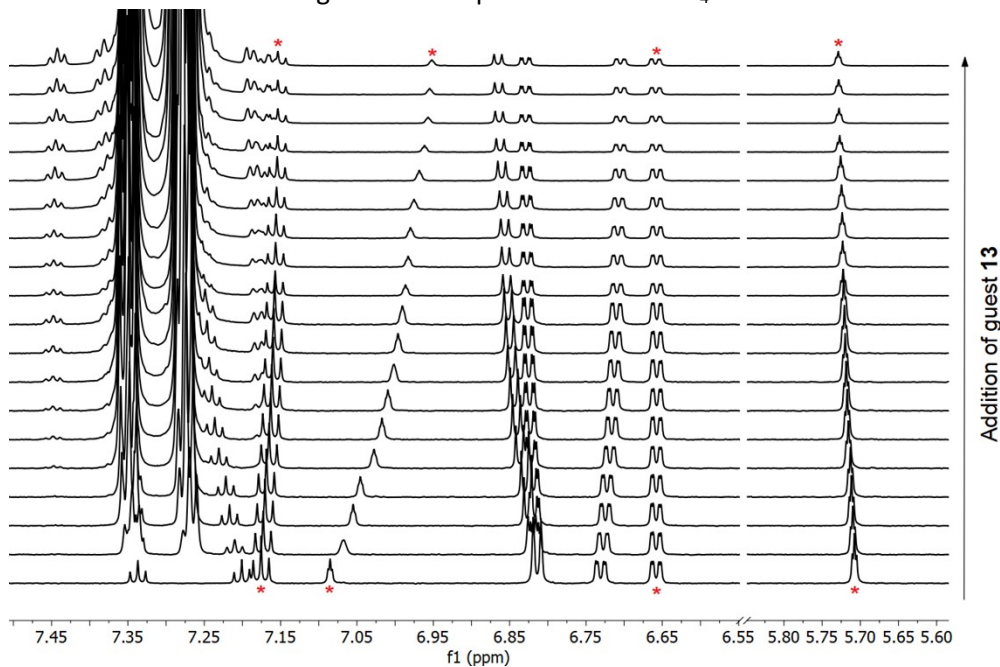

**Figure S11.**  $^1\text{H}$  NMR (methanol- $d_4$ , 800.13 MHz) spectra of **1** (0.2 mM) titration with **13** at 298 K. On the figure are shown the 19 titration points representing all the macrocycles' peaks with followed protons marked with asterisk (\*). Guest **13** concentration (M) in samples 0, 0.0005, 0.0009, 0.0014, 0.0028, 0.0041, 0.0054, 0.0073, 0.0089, 0.0113, 0.0131, 0.0150, 0.0172, 0.0214, 0.0290, 0.0398, 0.0498, 0.0555, 0.0639. The results of the  $K_a$  determination based on 1:2 binding model of Bindfit are accessible at the following link: [Bindfit 1:2 model results](#)



$^1\text{H}$  NMR titration data of host **1** and guest **14** complex in methanol- $d_4$

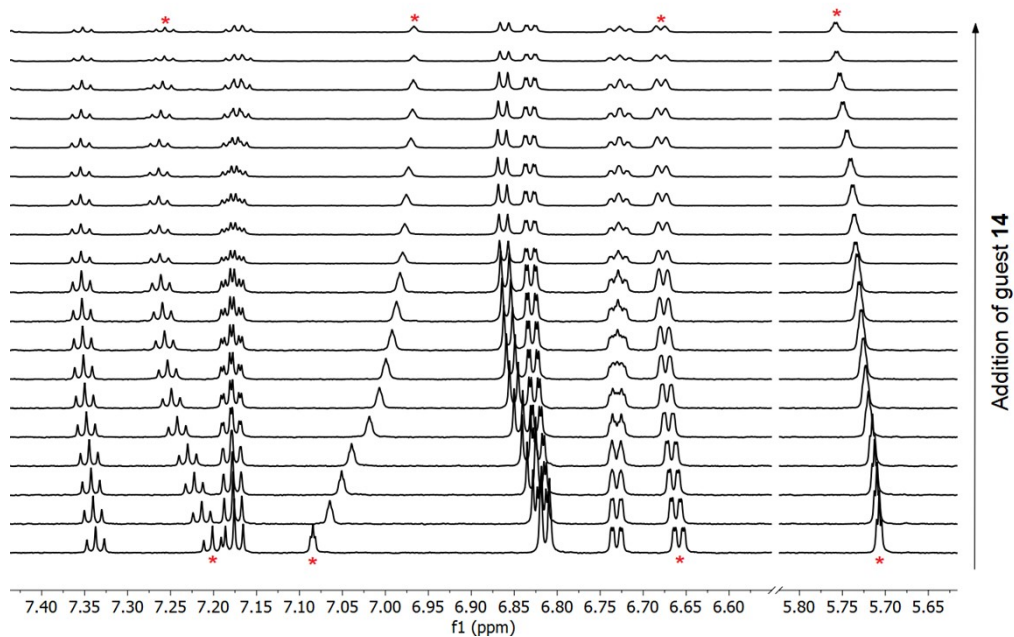

**Figure S12.**  $^1\text{H}$  NMR (methanol- $d_4$ , 800.13 MHz) spectra of **1** (0.7 mM) titration with **14** at 298 K. On the figure are shown the 19 titration points representing all the macrocycles' peaks with followed protons marked with asterisk (\*). Guest **14** concentration (M) in samples 0, 0.0017, 0.0033, 0.0054, 0.0112, 0.0166, 0.0215, 0.0290, 0.0355, 0.0442, 0.0524, 0.0602, 0.0681, 0.0839, 0.1110, 0.1558, 0.1943, 0.2312, 0.2442. [Bindfit 1:2 model results](#)

$^1\text{H}$  NMR titration data of host **1** added nitrobenzene **15** in methanol- $d_4$

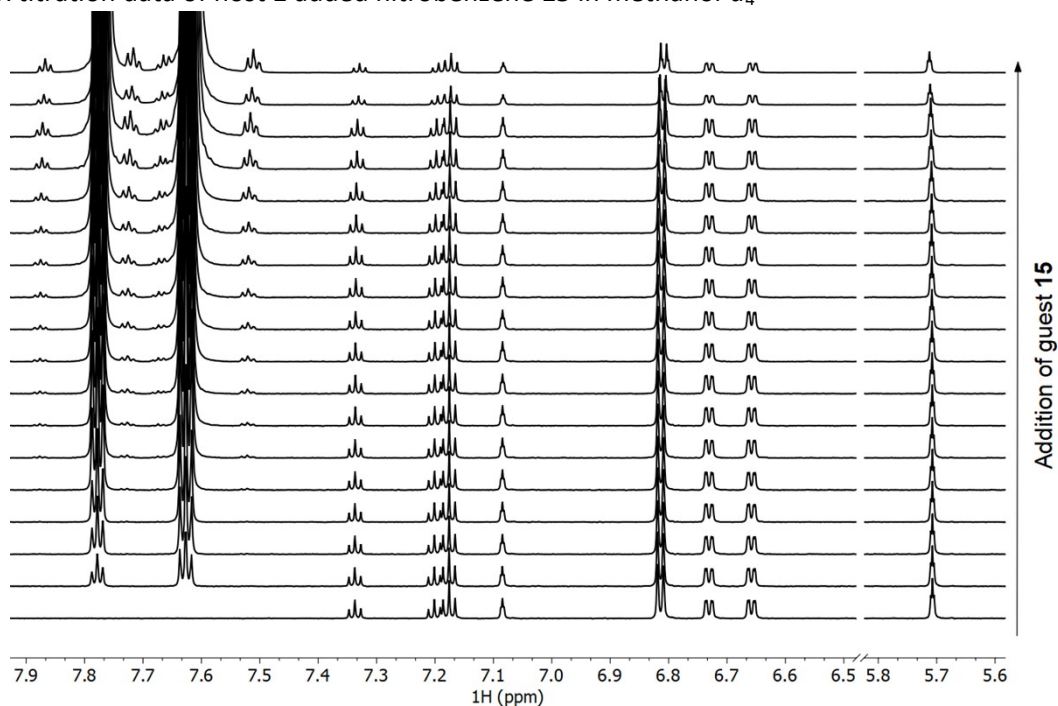

**Figure S13.**  $^1\text{H}$  NMR (methanol- $d_4$ , 800.13 MHz) spectra of **1** (0.7 mM) titration with nitrobenzene at 298 K. On the figure are shown the 18 titration points representing all the macrocycles' peaks with followed protons marked with asterisk (\*). Guest **15** concentration (M) in samples 0, 0.0017, 0.0031, 0.005, 0.01, 0.0157, 0.0209, 0.0265, 0.0344, 0.0429, 0.0505, 0.0594, 0.0683, 0.0838, 0.1172, 0.1424, 0.1993, 0.2623. No complex formation was observed. See ion mobility section for further information.

$^1\text{H}$  NMR titration data of host **1** and guest **16** complex in methanol- $d_4$

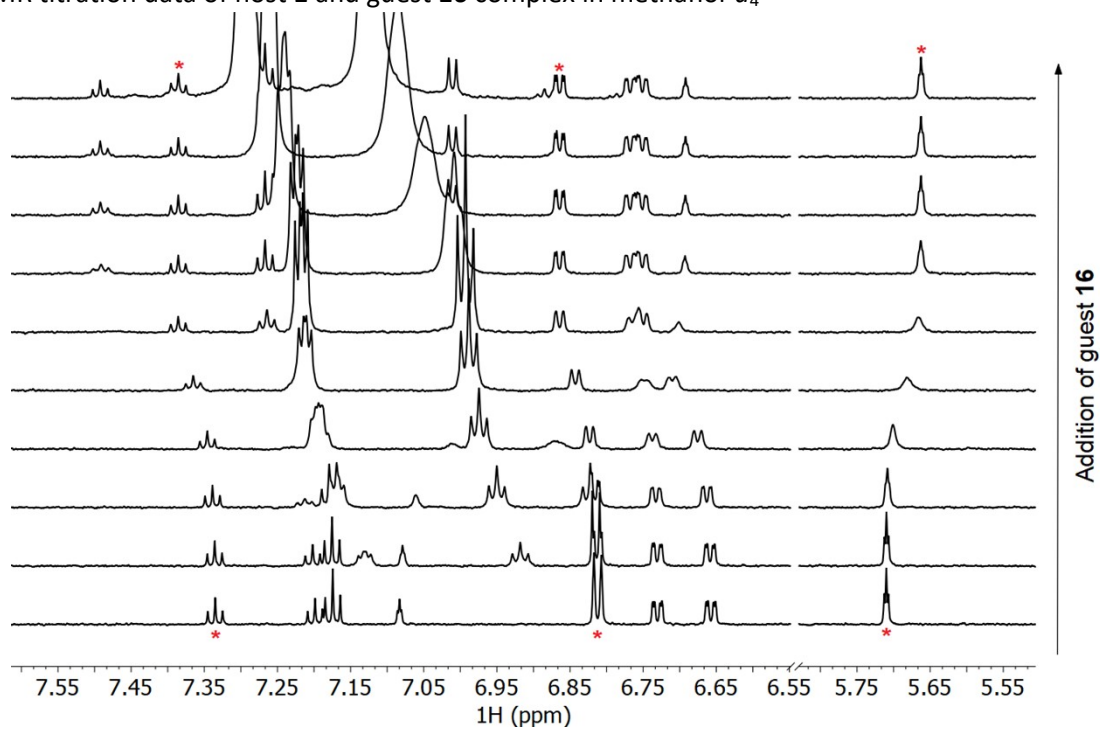

**Figure S14.**  $^1\text{H}$  NMR (methanol- $d_4$ , 800.13 MHz) spectra of **1** (0.2 mM) titration with **16** at 298 K. On the figure are shown the 10 titration points representing all the macrocycles' peaks with followed protons marked with asterisk (\*). Guest **16** added to samples from 0.2 to 9.7 equivalents.

$^1\text{H}$  NMR titration data of host **1** and guest **17** complex in methanol- $d_4$

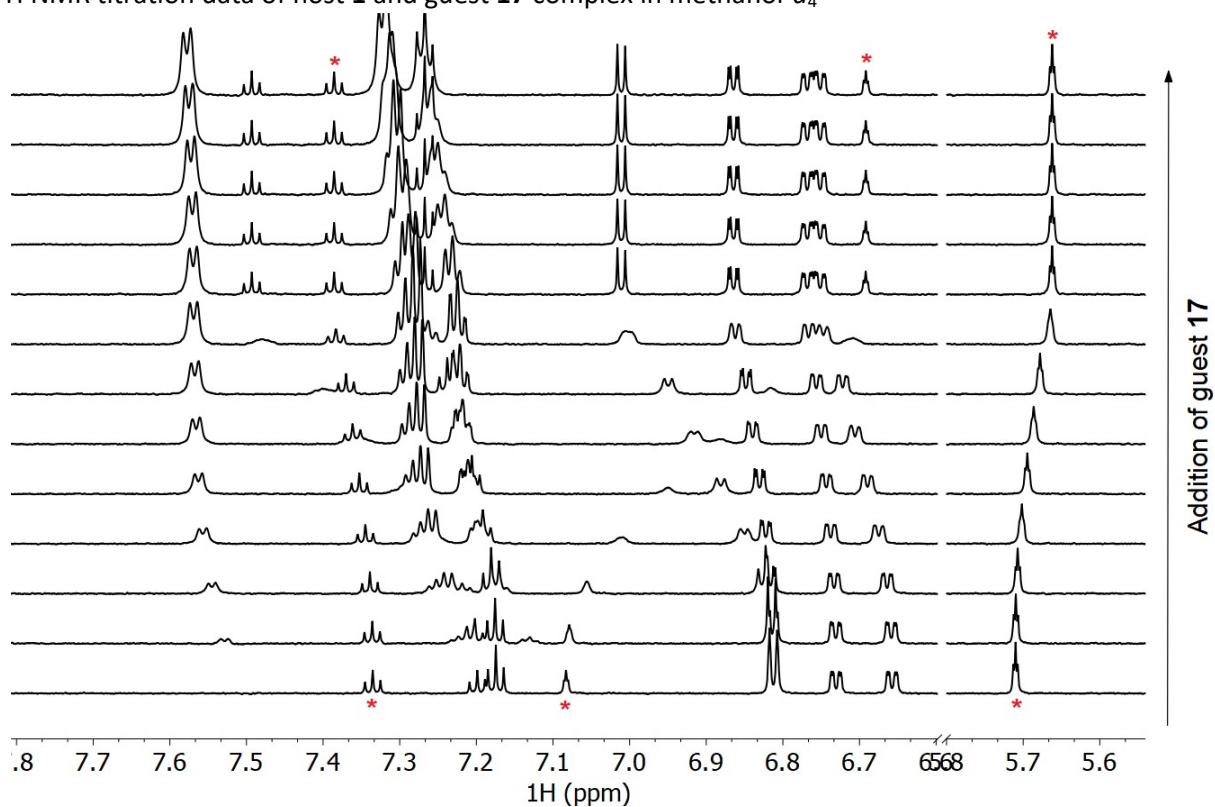

**Figure S15.**  $^1\text{H}$  NMR (methanol- $d_4$ , 800.13 MHz) spectra of **1** (0.2 mM) titration with **17** at 298 K. On the figure are shown the 13 titration points representing all the macrocycles' peaks with followed protons marked with asterisk (\*). Guest **17** added to samples from 0.2 to 2.6 equivalents.

$^1\text{H}$  NMR titration data of host **1** and guest **18** complex in methanol- $d_4$

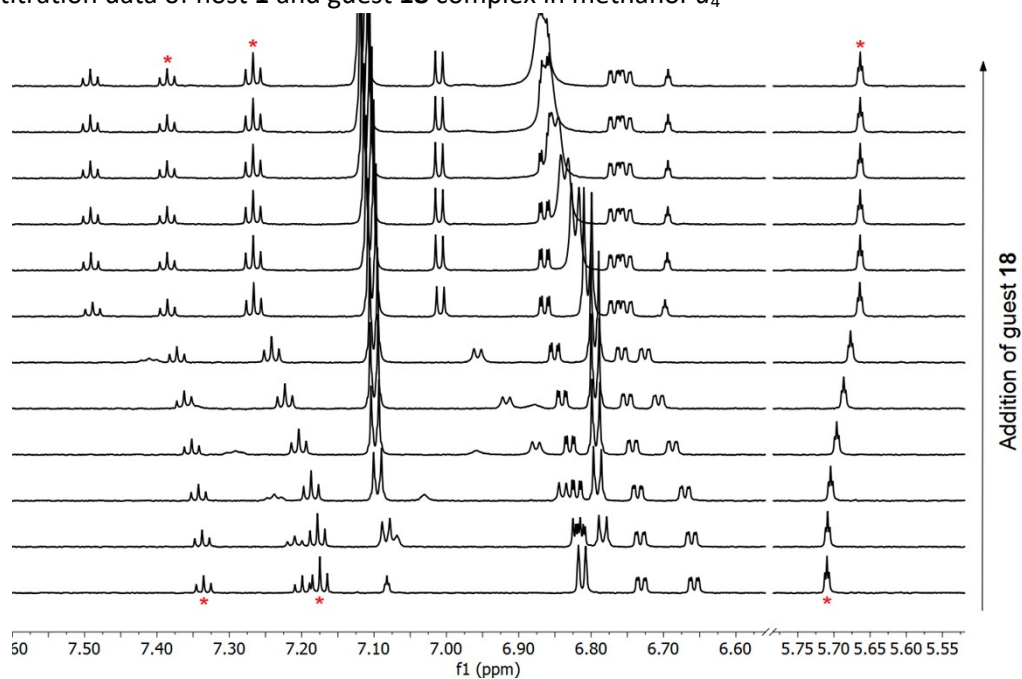

**Figure S16.**  $^1\text{H}$  NMR (methanol- $d_4$ , 800.13 MHz) spectra of **1** (0.2 mM) titration with **18** at 298 K. On the figure are shown the 12 titration points representing all the macrocycles' peaks with followed protons marked with asterisk (\*). Guest **18** added to samples from 0.4 to 2.3 equivalents.

$^1\text{H}$  NMR titration data of host **1** and guest **19** complex in methanol- $d_4$

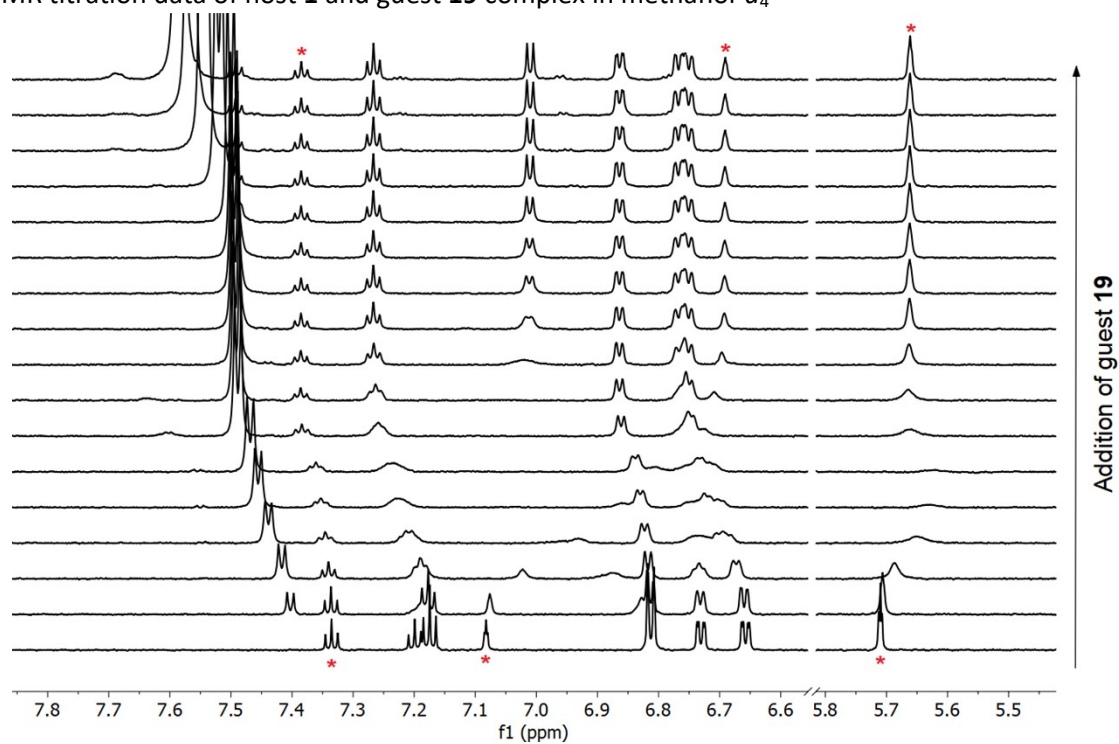

**Figure S17.**  $^1\text{H}$  NMR (methanol- $d_4$ , 800.13 MHz) spectra of **1** (0.2 mM) titration with **19** at 298 K. On the figure are shown the 17 titration points representing all the macrocycles' peaks with followed protons marked with asterisk (\*). Guest **19** added to samples from 0.3 to 10.3 equivalents.

$^1\text{H}$  NMR titration data of host **1** and guest **20** complex in methanol- $d_4$

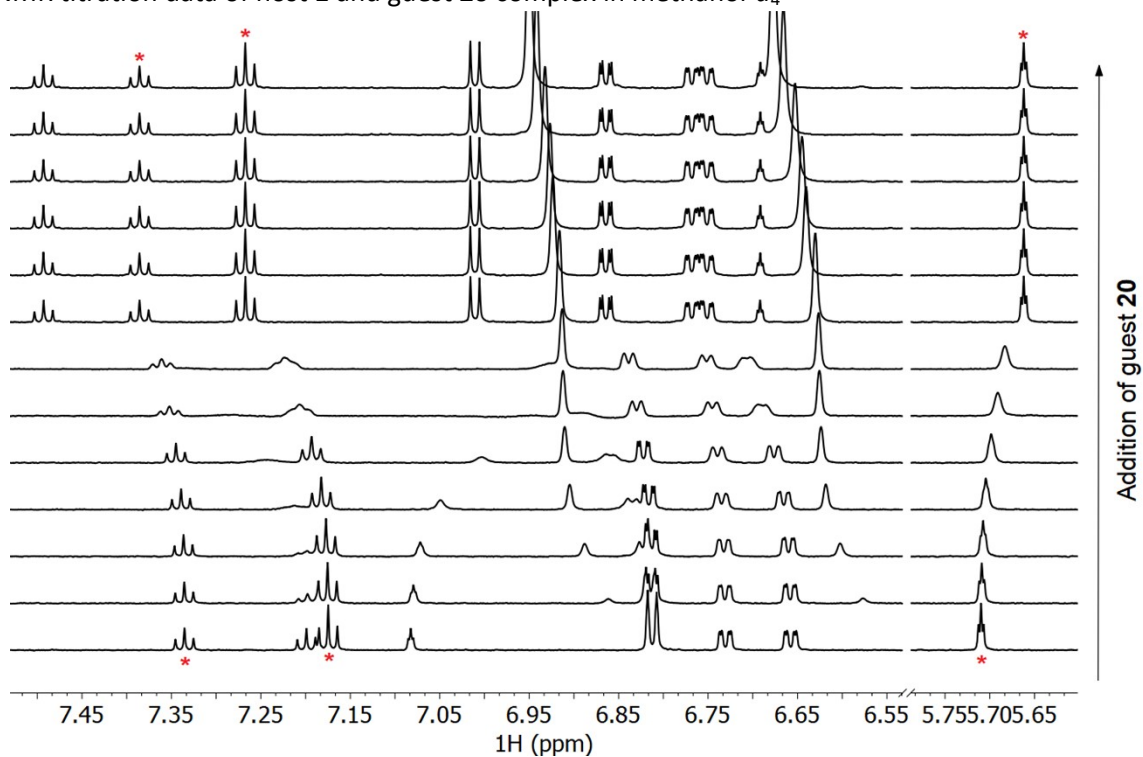

**Figure S18.**  $^1\text{H}$  NMR (methanol- $d_4$ , 800.13 MHz) spectra of **1** (0.2 mM) titration with **20** at 298 K. On the figure are shown the 13 titration points representing all the macrocycles' peaks with followed protons marked with asterisk (\*). Guest **20** added to samples from 0.2 to 5.8 equivalents.

$^1\text{H}$  NMR titration data of host **1** and guest **21** complex in methanol- $d_4$

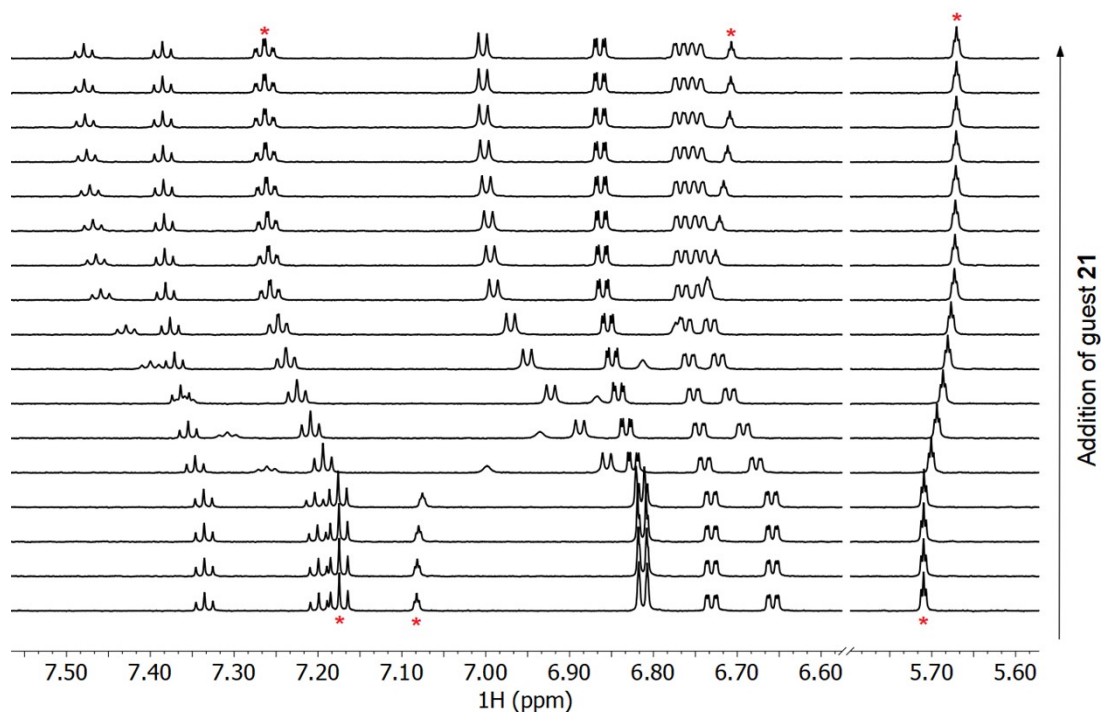

**Figure S19.**  $^1\text{H}$  NMR (methanol- $d_4$ , 800.13 MHz) spectra of **1** (0.2 mM) titration with **21** at 298 K. On the figure are shown the 17 titration points representing all the macrocycles' peaks with followed protons marked with asterisk (\*). Guest **21** added to samples from 0.2 to 7.6 equivalents.



$^1\text{H}$  NMR titration data of 2,6-dimethoxybenzoic acid and guest **2** complex in methanol- $d_4$

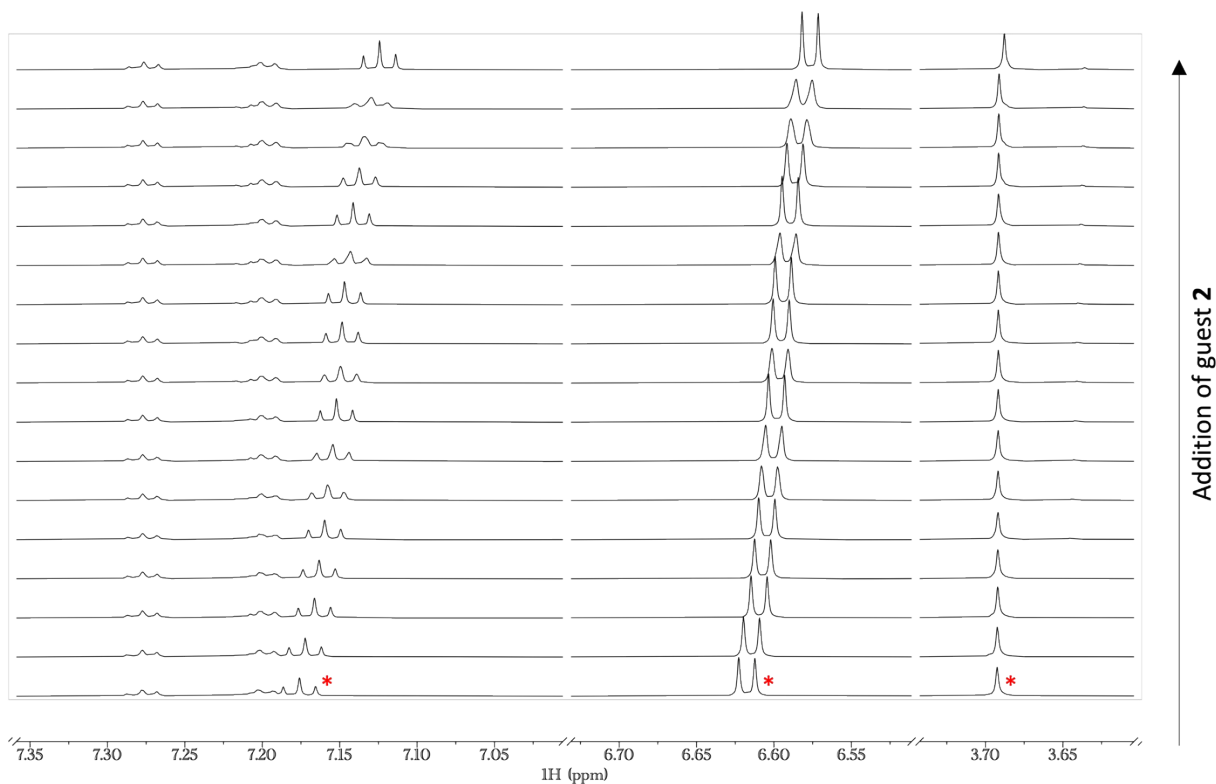

**Figure S20.**  $^1\text{H}$  NMR (methanol- $d_4$ , 800.13 MHz) spectra of 2,6-dimethoxybenzoic acid (0.7 mM) titration with **2** at 298 K. On the figure are shown the 17 titration points representing all the 2,6-dimethoxybenzoic acid peaks with followed protons marked with asterisk (\*). Guest **2** concentration (M) in samples 0, 0.0013, 0.0026, 0.0040, 0.0065, 0.0091, 0.0122, 0.0147, 0.0165, 0.0204, 0.0257, 0.0342, 0.0423, 0.0592, 0.0752, 0.1140, 0.1464. The results of the  $K_a$  determination based on 15 titration points and 1:2 binding model of Bindfit are accessible at the following link: [Bindfit 1:2 model results](#)

$^1\text{H}$  NMR titration data of host 2,6-dimethoxybenzoic acid and guest **11** complex in methanol- $d_4$

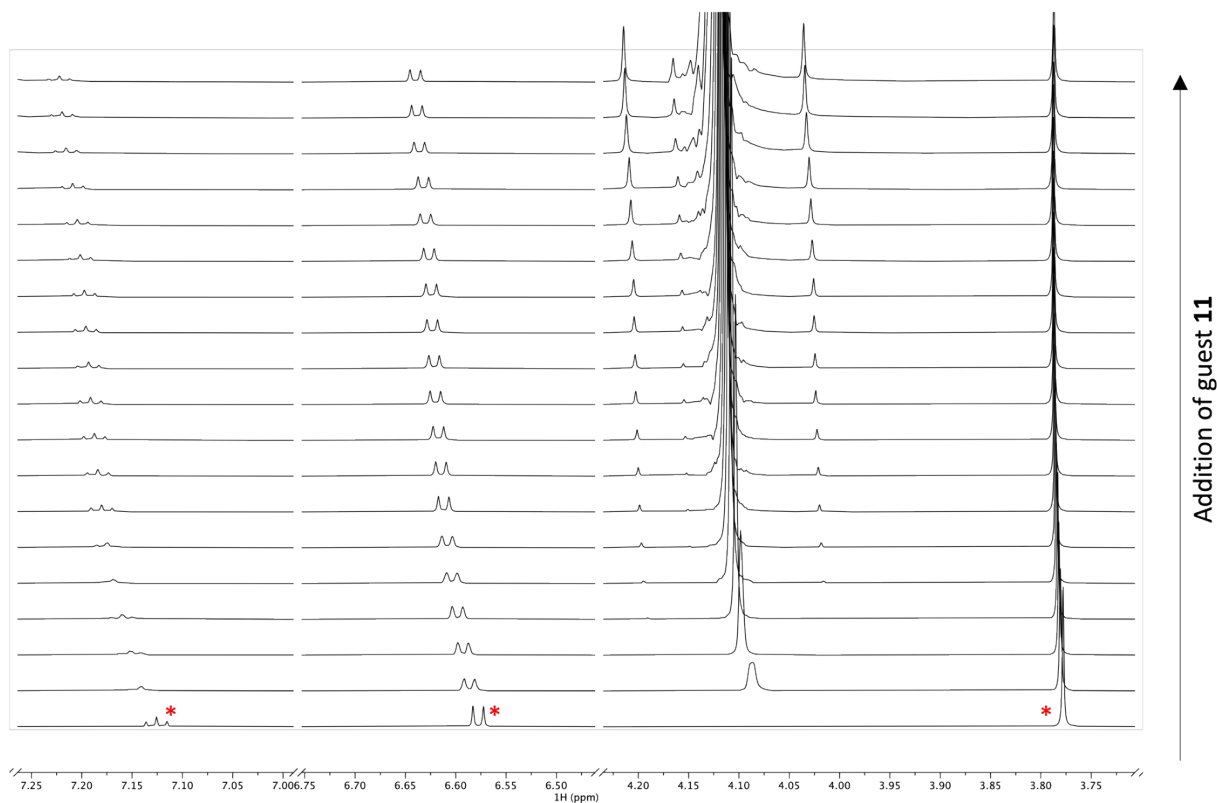

**Figure S21.**  $^1\text{H}$  NMR (methanol- $d_4$ , 800.13 MHz) spectra of 2,6-dimethoxybenzoic acid (0.7 mM) titration with **11** at 298 K. On the figure are shown the 19 titration points representing all the 2,6-dimethoxybenzoic acid peaks with followed protons marked with asterisk (\*). Guest **11** concentration (M) in samples 0, 0.0013, 0.0026, 0.0040, 0.0065, 0.0091, 0.0122, 0.0147, 0.0165, 0.0204, 0.0257, 0.0342, 0.0423, 0.0592, 0.0752, 0.1140, 0.1464. The results of the  $K_a$  determination based on 14 titration points 1:2 binding model of Bindfit are accessible at the following link: [Bindfit 1:2 model results](#)

$^1\text{H}$  NMR titration data of host 2,6-dimethoxybenzoic acid and guest **12** complex in methanol- $d_4$

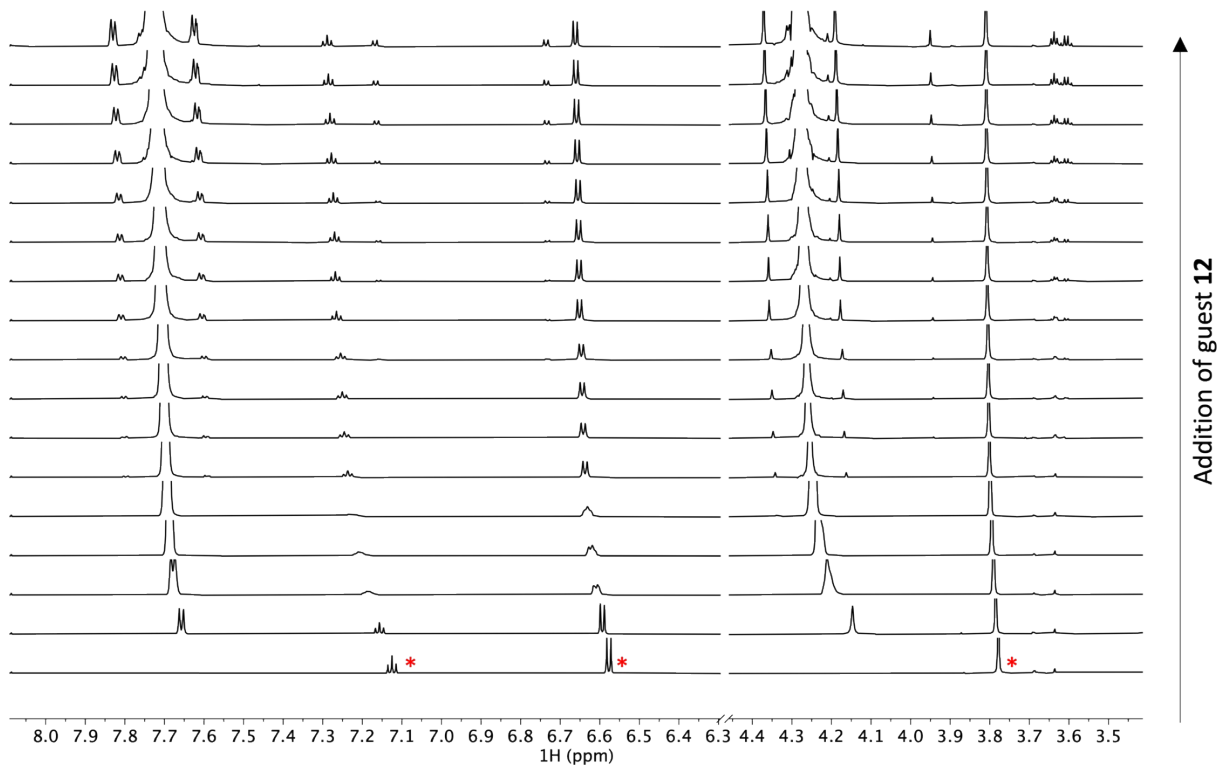

**Figure S22.**  $^1\text{H}$  NMR (methanol- $d_4$ , 800.13 MHz) spectra of 2,6-dimethoxybenzoic acid (0.7 mM) titration with **12** at 298 K. On the figure are shown the 17 titration points representing all the 2,6-dimethoxybenzoic acid peaks with followed protons marked with asterisk (\*). Guest **12** concentration (M) in samples 0, 0.0013, 0.0026, 0.0040, 0.0065, 0.0091, 0.0122, 0.0147, 0.0165, 0.0204, 0.0257, 0.0342, 0.0423, 0.0592, 0.0752, 0.1140, 0.1464. The results of the  $K_a$  determination based on 14 titration points 1:2 binding model of Bindfit are accessible at the following link: [Bindfit 1:2 model results](#)

ESI-MS

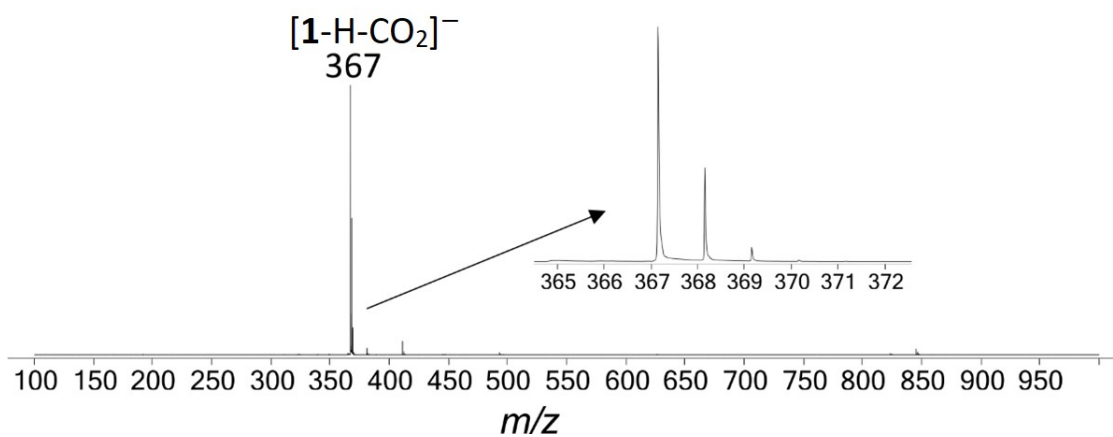

**Figure S23.** (-)ESI-MS spectrum of host **1** in acetonitrile. Inset shows zoomed view for isotopic distribution.

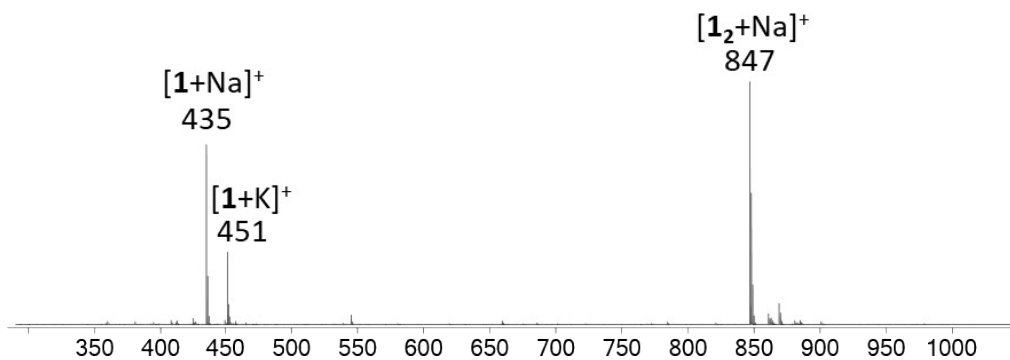

**Figure S24.** (+)ESI-MS spectrum of host **1** in acetonitrile.

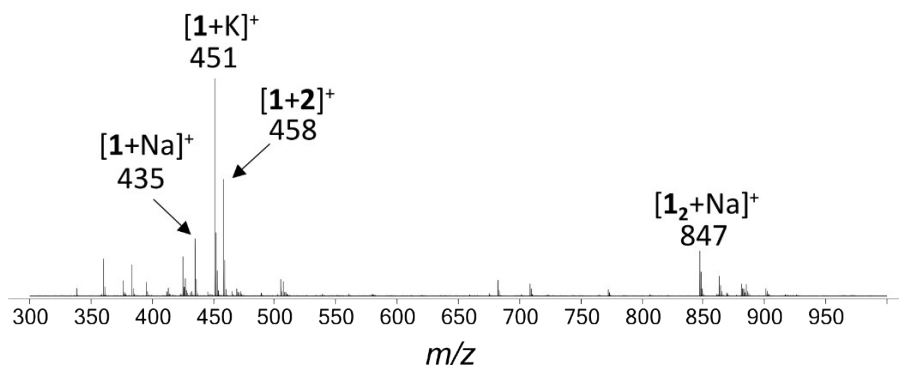

**Figure S25.** (+)ESI-MS spectrum 1:1 mixture of host **1** with guest **2**.

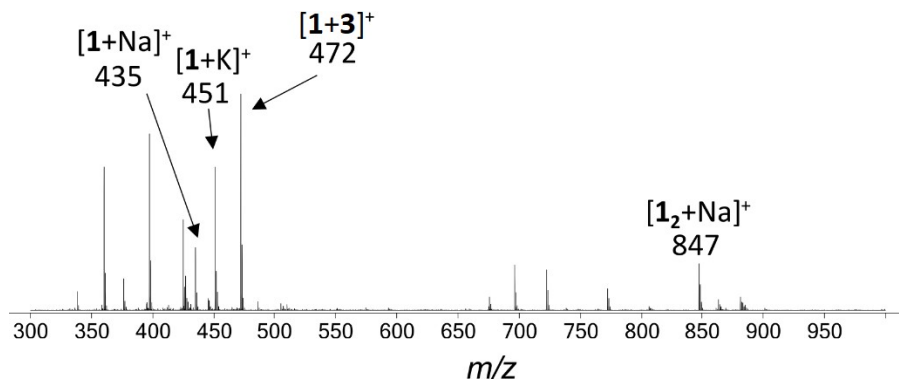

**Figure S26.** (+)ESI-MS spectrum 1:1 mixture of host **1** with guest **3**.

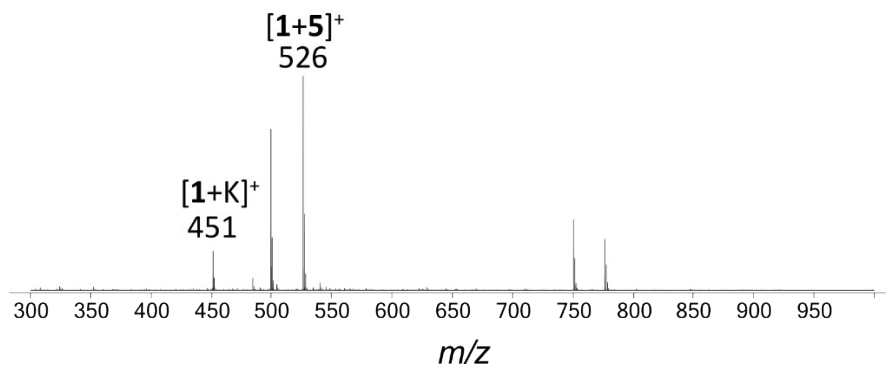

**Figure S27.** (+)ESI-MS spectrum 1:1 mixture of host **1** with guest **5**.

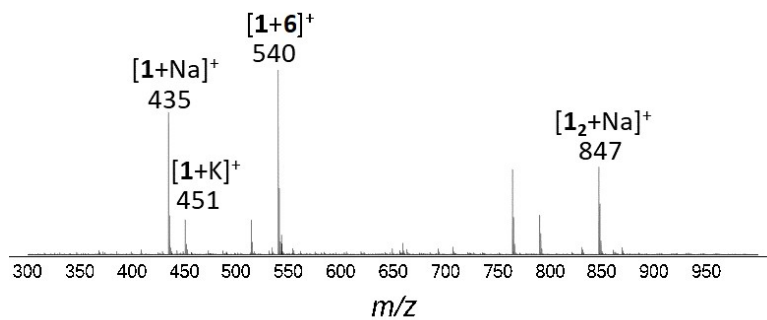

**Figure S28.** (+)ESI-MS spectrum 1:1 mixture of host **1** with guest **6**.

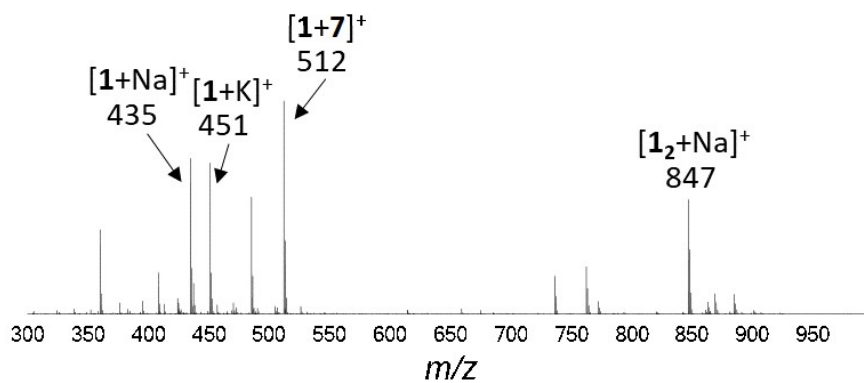

**Figure S29.** (+)ESI-MS spectrum 1:1 mixture of host **1** with guest **7**.

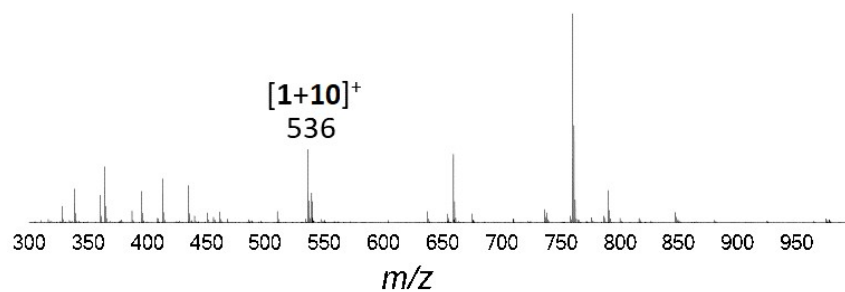

**Figure S30.** (+)ESI-MS spectrum 1:1 mixture of host **1** with guest **10**.

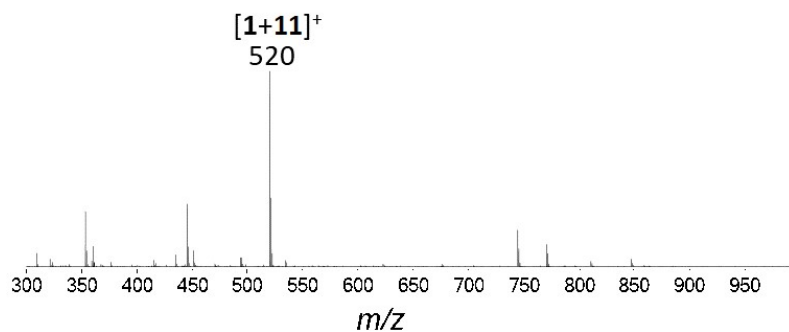

**Figure S31.** (+)ESI-MS spectrum 1:1 mixture of host **1** with guest **11**.

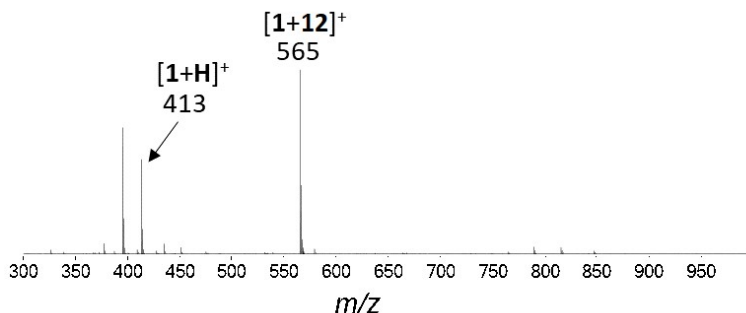

**Figure S32.** (+)ESI-MS spectrum 1:1 mixture of host **1** with guest **12**.

### Ion mobility mass spectrometry

Figure 4 shows that all the ions of the complexes have drift times slightly longer than the free host, evidencing that the ammonium guests are located outside the oxacalixarene cavity with only the ammonium unit connected to the macrocycle's binding site. In the  $[1+\text{Na}]^+$  drift spectrum the second ion with longer drift time belongs to  $[1_2+\text{Na}]^+$  complex that appears due to the post-drift tube fragmentation. This is evidenced by the  $1_2$  dimers drift time that is 35.08 ms, whereas in the  $[1+\text{Na}]^+$  drift spectrum the second ions drift time is 34.89 ms. In  $[1+12]^+$  drift spectrum the second less abundant ion population with longer drift time likely belongs to  $[1_2+12]^+$  ion, where two macrocycles are interacting with the guest with one interaction taking place due to hydrogen bonding and the other with the nitro group.

**Table S2.** (+)ESI-MS detected ions of  $[1 + \text{guest}]^+$  1:1 complexes in acetonitrile with their corresponding CCS values.

| ion               | $m/z_{\text{exp}}$ | $m/z_{\text{theor}}$ | $\Delta m/z$<br>(mDa) | Experimental<br>$^{\text{DT}}\text{CCS}_{\text{N}_2}$ ( $\text{\AA}^2$ ) | Theoretical<br>$^{\text{TMLJ}}\text{CCS}_{\text{N}_2}$ ( $\text{\AA}^2$ ) <sup>[a]</sup> | $\Delta\text{CCS}$<br>(%) |
|-------------------|--------------------|----------------------|-----------------------|--------------------------------------------------------------------------|------------------------------------------------------------------------------------------|---------------------------|
| $[1+\text{Na}]^+$ | 435.0837           | 435.0839             | 0.20                  | 196.9                                                                    | 178.3 <sup>[c]</sup>                                                                     | 9.4                       |
| $[1+2]^+$         | 458.1604           | 458.1598             | 0.60                  | 202.1                                                                    | 192.1                                                                                    | 4.9                       |
| $[1+3]^+$         | 472.1757           | 472.1755             | 0.20                  | 205.0                                                                    | 199.4                                                                                    | 2.7                       |
| $[1+5]^+$         | 526.2228           | 526.2224             | 0.40                  | 218.1                                                                    | -                                                                                        | -                         |
| $[1+6]^+$         | 540.2367           | 540.2381             | -1.40                 | 221.5                                                                    | -                                                                                        | -                         |
| $[1+7]^+$         | 512.2073           | 512.2068             | 0.50                  | 214.5                                                                    | -                                                                                        | -                         |
| $[1+10]^+$        | 536.1687           | 536.1704             | 1.70                  | 212.7                                                                    | -                                                                                        | -                         |
| $[1+11]^+$        | 520.1762           | 520.1755             | 0.70                  | 211.8                                                                    | 216.2                                                                                    | 2.1                       |
| $[1+12]^+$        | 565.1590           | 565.1605             | -1.50                 | 216.9                                                                    | 211.5                                                                                    | 2.5                       |

[a] Theoretical  $^{\text{TMLJ}}\text{CCS}_{\text{N}_2}$  values calculated based on DFT calculated structures optimized at B97D/6-311+G(2d,p) level of theory.

[b] Free host  $[1+\text{Na}]^+$  ion  $m/z$  value and experimental  $^{\text{DT}}\text{CCS}_{\text{N}_2}$  value. [c] For reference is given theoretical  $^{\text{TMLJ}}\text{CCS}_{\text{N}_2}$  calculation of **1**, based on the coordinates obtained from the SCXRD analysis of the macrocycle.

Ions of cyclohexane containing guests (**5** and **6**) exhibited highest CCS values (218.1  $\text{\AA}^2$  and 221.5  $\text{\AA}^2$ ) indicating a slightly different binding geometry from aromatic ammonium guests.

## DFT calculations

The procedure for generating initial structures for sampling gas-phase PES of each single-charged host-guest pair of oxacalix[4]arene **1** with monoammonium guest species **2**, **3**, **11**, and **12** is based on multi-stage approach. The optimized geometry of the macrocycle was taken from the previous report.<sup>[3]</sup> Six structures of its complex, with randomly chosen positions of the sodium cation binding sites characterized by representative spatial locations either within or in close proximity to macrocycle cavity were generated and the full geometry optimizations were carried out in the gas phase for each structure at B3LYP/6-311+G(2d,p) level of theory. This sampling resulted in a preferential position of the Na<sup>+</sup> ion being located at the extension of O=C bond axis of carboxylic acid group towards the cavity with Boltzmann probability of 99%. Based on that finding, the starting structures of ammonium guest complexes were constructed with nitrogen atom always positioned at the same atomic coordinates as was established for Na<sup>+</sup> ion while for each complex, 5 to 10 alternative structures were considered with distinct variations in the terminal ring or chain orientation. Again, B3LYP/6-311+G(2d,p) method was chosen for geometry optimizations. The few representative low-energy structures of each complex were re-optimized using B97D<sup>[4]</sup>/6-311+G(2d,p)<sup>[5,6]</sup> level of theory with empirical dispersion corrections. Subsequently, the absence of imaginary eigenvalues was confirmed by vibrational normal mode analysis for each optimized structure using the same theoretical method. The reliability of theoretical procedure for obtaining these true minima structures of the complexes was confirmed by close match between experimental and theoretical CCS values.

The similar conformational sampling procedure starting from the variety of initial configurations was used for elucidating the lowest-energy structures of the charge-neutral ion pairs formed in methanol as a result of complexation of monoammonium guest species **8**, **11**, and **12** with carboxylate form of oxacalix[4]arene **1**, with one notable exception – all geometry optimizations and vibrational normal mode calculations were carried out at PCM/B97D/6-311+G(2d,p) level where the solvent effects were treated in the framework of polarized continuum approximation.

The DFT calculations were performed with the Gaussian 09<sup>[7]</sup> quantum chemistry suite.



Molecular Cartesian coordinates of the [1+8]<sup>+</sup> host-guest complex in MeOH (Å)

|   |             |             |             |
|---|-------------|-------------|-------------|
| O | 3.75591300  | 1.03934500  | -0.04109600 |
| O | 1.38299000  | -3.07474600 | -1.01071600 |
| O | 2.45203800  | -0.01724000 | -2.75094300 |
| O | 0.53459400  | -0.22617100 | -1.56279900 |
| O | -0.59072700 | 2.75014300  | 1.36035200  |
| O | -2.42602200 | -1.71905500 | 1.71697600  |
| C | 3.44494800  | -0.28583200 | 0.22742400  |
| C | 2.51489100  | -0.99279400 | -0.55795100 |
| C | 2.26314000  | -2.33143900 | -0.22493200 |
| C | 1.83761700  | -0.35538700 | -1.74948600 |
| C | 2.71696600  | 1.96657800  | -0.08690800 |
| C | 2.92772500  | -2.96721900 | 0.82391100  |
| H | 2.70539300  | -4.00895900 | 1.03981800  |
| C | 4.11539800  | -0.90313800 | 1.28454600  |
| H | 4.81863200  | -0.32033200 | 1.87383600  |
| C | 1.57075100  | 1.81870400  | 0.70268800  |
| H | 1.45437900  | 0.95734000  | 1.35199200  |
| C | 0.03639500  | -3.07258300 | -0.67564900 |
| C | 2.89286600  | 3.06688500  | -0.92817200 |
| H | 3.79185400  | 3.14618900  | -1.53339900 |
| C | -0.89276500 | 1.60905300  | 2.10457900  |
| C | -1.84914200 | -2.38159000 | 0.64432100  |
| C | -0.46966700 | -2.36614400 | 0.41867200  |
| H | 0.18405800  | -1.78507900 | 1.05911400  |
| C | 0.57027000  | 2.79227000  | 0.61541900  |
| C | -1.40271700 | 0.47743100  | 1.46529800  |
| H | -1.50338300 | 0.44657800  | 0.38525500  |
| C | 3.86309000  | -2.24761200 | 1.57229600  |
| H | 4.38631600  | -2.73081500 | 2.39418300  |
| C | -0.80424300 | -3.81367300 | -1.51452900 |
| H | -0.38363400 | -4.35073800 | -2.36093800 |
| C | -1.80367000 | -0.60169100 | 2.26272100  |
| C | 0.71555000  | 3.90308500  | -0.22774600 |
| H | -0.07839600 | 4.64357300  | -0.27878700 |
| C | -0.76305800 | 1.67889200  | 3.49352100  |
| H | -0.35875300 | 2.57869900  | 3.95012500  |
| C | 1.88165000  | 4.03232800  | -0.98476900 |
| H | 1.99874700  | 4.89110200  | -1.64280000 |
| C | -2.17584100 | -3.83209100 | -1.24659800 |
| H | -2.83837600 | -4.40258500 | -1.89455800 |
| C | -2.71403400 | -3.11590700 | -0.17337100 |
| H | -3.78175400 | -3.11086600 | 0.02825500  |
| C | -1.16908500 | 0.58531600  | 4.26526700  |
| H | -1.07634500 | 0.62402300  | 5.34848700  |
| C | -1.68867700 | -0.56072000 | 3.65556100  |
| H | -2.01066200 | -1.41723500 | 4.24260600  |
| N | -1.13910900 | 0.91711300  | -3.28028900 |
| H | -1.38434400 | 0.24967800  | -4.00777100 |
| H | -0.81629000 | 1.77972100  | -3.71110300 |
| H | 0.05255200  | 0.22154300  | -2.35418400 |
| C | -2.19448100 | 1.12568300  | -2.34242800 |
| C | -3.00693500 | 0.04744100  | -1.95828700 |
| C | -2.35505200 | 2.37300700  | -1.72193300 |
| C | -3.98819900 | 0.22868100  | -0.98065100 |
| H | -2.85684100 | -0.93112000 | -2.41088500 |
| C | -3.33494000 | 2.54288300  | -0.74029600 |
| H | -1.70413200 | 3.19992400  | -2.00012000 |

|   |             |             |             |
|---|-------------|-------------|-------------|
| C | -4.15991600 | 1.47546300  | -0.36730200 |
| H | -4.60687400 | -0.61594300 | -0.68554400 |
| H | -3.44460000 | 3.51284900  | -0.25942500 |
| H | -4.91710400 | 1.60917500  | 0.40237100  |

Molecular Cartesian coordinates of the **[1+11]<sup>+</sup>** host-guest complex in MeOH (Å)

|   |             |             |             |
|---|-------------|-------------|-------------|
| O | 2.73970800  | 2.44155900  | -0.40326100 |
| O | 2.85263400  | -2.34732400 | -0.37517400 |
| O | 4.24625500  | 0.07018600  | -2.42895200 |
| O | 2.02048200  | 0.00959200  | -2.70495700 |
| O | -1.79528400 | 2.35936100  | 1.43289100  |
| O | -1.68896800 | -2.44714000 | 1.44274300  |
| C | 3.02644600  | 1.24807800  | 0.27177000  |
| C | 2.99230700  | 0.05151900  | -0.45746200 |
| C | 3.08347800  | -1.13378200 | 0.28588200  |
| C | 3.08248400  | 0.04314700  | -1.99384500 |
| C | 1.42441400  | 2.87949300  | -0.33229400 |
| C | 3.35829300  | -1.13823700 | 1.65329900  |
| H | 3.42738500  | -2.08707700 | 2.17943500  |
| C | 3.29953300  | 1.28128600  | 1.63941000  |
| H | 3.32248100  | 2.23835000  | 2.15454400  |
| C | 0.48082200  | 2.31756000  | 0.54503500  |
| H | 0.75481000  | 1.51004400  | 1.21288600  |
| C | 1.55187600  | -2.82993600 | -0.31886900 |
| C | 1.07280700  | 3.93562100  | -1.17991900 |
| H | 1.81225900  | 4.35007000  | -1.85996200 |
| C | -1.53100200 | 1.16169900  | 2.10241200  |
| C | -0.69702200 | -2.87981300 | 0.57607100  |
| C | 0.58925300  | -2.31884300 | 0.56845100  |
| H | 0.83688600  | -1.51852900 | 1.25532000  |
| C | -0.82156900 | 2.83929300  | 0.57127500  |
| C | -1.76774100 | -0.04463300 | 1.44237500  |
| H | -2.17580800 | -0.05588500 | 0.43762000  |
| C | 3.49714900  | 0.07964600  | 2.32635500  |
| H | 3.71346400  | 0.09101000  | 3.39184200  |
| C | 1.23668000  | -3.87806800 | -1.19039600 |
| H | 1.99032900  | -4.25242200 | -1.87804800 |
| C | -1.47836200 | -1.23645300 | 2.10806100  |
| C | -1.19348200 | 3.89457400  | -0.26938300 |
| H | -2.20951900 | 4.27849000  | -0.23867300 |
| C | -1.05243600 | 1.19313200  | 3.41284100  |
| H | -0.87252400 | 2.14873300  | 3.89842000  |
| C | -0.23497700 | 4.42954800  | -1.13546800 |
| H | -0.51579700 | 5.24582900  | -1.79785600 |
| C | -0.05482600 | -4.41421600 | -1.16160600 |
| H | -0.30792400 | -5.22360500 | -1.84334100 |
| C | -1.03297400 | -3.92756700 | -0.28891200 |
| H | -2.03737200 | -4.34177900 | -0.27247400 |
| C | -0.80139500 | -0.01739100 | 4.06980100  |
| H | -0.42757800 | -0.00680200 | 5.09105500  |
| C | -0.99975600 | -1.24090300 | 3.41872700  |
| H | -0.77867200 | -2.18544200 | 3.90892300  |
| N | -0.28722400 | -0.02440100 | -1.63903300 |
| H | 0.75672800  | -0.01031500 | -2.08287900 |
| H | -0.38108400 | 0.80001900  | -1.03580200 |
| H | -0.36109400 | -0.85119800 | -1.03697800 |

|   |             |             |             |
|---|-------------|-------------|-------------|
| C | -1.36218300 | -0.03523700 | -2.69359100 |
| H | -1.19386900 | -0.92718600 | -3.30374500 |
| H | -1.20733000 | 0.85670900  | -3.30737600 |
| C | -2.72225200 | -0.04399700 | -2.04386000 |
| C | -3.33611700 | 1.16404100  | -1.68067900 |
| C | -3.32556200 | -1.25987000 | -1.68920300 |
| C | -4.53360700 | 1.15689400  | -0.95914100 |
| H | -2.86357600 | 2.10839200  | -1.94571700 |
| C | -4.52315100 | -1.26813800 | -0.96761700 |
| H | -2.84453500 | -2.19793200 | -1.96137900 |
| C | -5.12594800 | -0.05944800 | -0.59776800 |
| H | -4.99852800 | 2.09797100  | -0.67232300 |
| H | -4.98027700 | -2.21510300 | -0.68771200 |
| H | -6.05399400 | -0.06541800 | -0.02939400 |

Molecular Cartesian coordinates of the **[1+12]<sup>+</sup>** host-guest complex in MeOH (Å)

|   |             |             |             |
|---|-------------|-------------|-------------|
| O | 3.19981900  | 2.45778200  | -0.27559000 |
| O | 3.38887200  | -2.32376200 | -0.21374300 |
| O | 4.89288300  | 0.11326900  | -2.17387100 |
| O | 2.72255800  | 0.00016100  | -2.64381600 |
| O | -1.42008500 | 2.33368000  | 1.33436700  |
| O | -1.25043300 | -2.47691500 | 1.33382100  |
| C | 3.46492400  | 1.27865900  | 0.42474900  |
| C | 3.49387800  | 0.07463100  | -0.29284700 |
| C | 3.56194500  | -1.10957700 | 0.45564600  |
| C | 3.72455300  | 0.06319500  | -1.80355800 |
| C | 1.87497200  | 2.88514900  | -0.26686800 |
| C | 3.75693700  | -1.09998200 | 1.83621200  |
| H | 3.81138600  | -2.04441400 | 2.37134200  |
| C | 3.65736200  | 1.31950800  | 1.80571300  |
| H | 3.63349300  | 2.27840000  | 2.31681300  |
| C | 0.89907300  | 2.32129500  | 0.57067200  |
| H | 1.14466800  | 1.52142400  | 1.25839000  |
| C | 2.08522500  | -2.81377900 | -0.24249000 |
| C | 1.55476600  | 3.92747400  | -1.14270800 |
| H | 2.32194000  | 4.34276400  | -1.79074600 |
| C | -1.19269700 | 1.13421400  | 2.01377800  |
| C | -0.20935000 | -2.88505800 | 0.51468400  |
| C | 1.07633400  | -2.33329000 | 0.60714300  |
| H | 1.27834800  | -1.55041700 | 1.32802900  |
| C | -0.40985600 | 2.82175600  | 0.52157700  |
| C | -1.32594000 | -0.07161800 | 1.32464100  |
| H | -1.59928400 | -0.08174800 | 0.27670100  |
| C | 3.83567800  | 0.12399700  | 2.50753600  |
| H | 3.98952000  | 0.14401400  | 3.58358900  |
| C | 1.82356800  | -3.83044500 | -1.16643100 |
| H | 2.61583100  | -4.17985100 | -1.82304900 |
| C | -1.10834300 | -1.26489700 | 2.01455700  |
| C | -0.75245500 | 3.86552700  | -0.34539800 |
| H | -1.77386200 | 4.23554100  | -0.36919000 |
| C | -0.87246800 | 1.16316900  | 3.37171900  |
| H | -0.77088100 | 2.11771500  | 3.88145700  |
| C | 0.24073700  | 4.40604000  | -1.16766000 |
| H | -0.01678900 | 5.21270000  | -1.85092100 |
| C | 0.53219300  | -4.36363100 | -1.23278500 |
| H | 0.31871700  | -5.14791400 | -1.95605800 |

|   |             |             |             |
|---|-------------|-------------|-------------|
| C | -0.49513900 | -3.90106600 | -0.40457900 |
| H | -1.50022400 | -4.30991000 | -0.46327900 |
| C | -0.68230500 | -0.04840900 | 4.04715900  |
| H | -0.43301900 | -0.03932700 | 5.10576400  |
| C | -0.78841400 | -1.27092500 | 3.37272600  |
| H | -0.62113100 | -2.21576500 | 3.88321400  |
| N | 0.35321000  | -0.06206300 | -1.71784600 |
| H | 1.73021800  | -0.02847900 | -2.19228000 |
| H | 0.22034400  | 0.72503000  | -1.07922000 |
| H | 0.22427400  | -0.91160800 | -1.16505000 |
| C | -0.66156800 | -0.00680000 | -2.80912500 |
| H | -0.49697400 | -0.87174000 | -3.45984800 |
| H | -0.48314800 | 0.90737400  | -3.38451500 |
| C | -2.05619100 | -0.01905700 | -2.22798800 |
| C | -2.67755000 | 1.18619800  | -1.86367900 |
| C | -2.67712100 | -1.23839500 | -1.91029100 |
| C | -3.88335700 | 1.18286600  | -1.16667600 |
| H | -2.19669900 | 2.13265200  | -2.09966600 |
| C | -3.88373900 | -1.26206400 | -1.21532300 |
| H | -2.19760400 | -2.17536300 | -2.18457100 |
| C | -4.46785800 | -0.04617200 | -0.84337400 |
| H | -4.35925300 | 2.10964300  | -0.86469000 |
| H | -4.36109600 | -2.19969700 | -0.95137000 |
| N | -5.73355700 | -0.06113500 | -0.07836900 |
| O | -6.24319900 | -1.15599300 | 0.18472500  |
| O | -6.22080000 | 1.02181200  | 0.26438900  |

Molecular Cartesian coordinates of the **[1+2]<sup>+</sup>** host-guest complex (Å)

|   |             |             |             |
|---|-------------|-------------|-------------|
| O | 3.17400000  | -1.75000000 | 0.78200000  |
| O | -1.63500000 | -1.91900000 | 1.50800000  |
| O | 1.33000000  | -3.28900000 | -0.71800000 |
| H | 1.16700000  | -3.47900000 | -1.66000000 |
| O | -0.34200000 | -1.84500000 | -1.10300000 |
| O | 2.13300000  | 2.28300000  | -1.75600000 |
| O | -2.15700000 | 2.79300000  | 0.37600000  |
| C | 2.05600000  | -1.65700000 | 1.57500000  |
| C | 0.74900000  | -1.86800000 | 1.06400000  |
| C | -0.33100000 | -1.70200000 | 1.95200000  |
| C | 0.51100000  | -2.29500000 | -0.34300000 |
| C | 3.25200000  | -0.95500000 | -0.36200000 |
| C | -0.13800000 | -1.39500000 | 3.29600000  |
| H | -1.00500000 | -1.29800000 | 3.94500000  |
| C | 2.25600000  | -1.34300000 | 2.91900000  |
| H | 3.27300000  | -1.18200000 | 3.26800000  |
| C | 2.59700000  | 0.28100000  | -0.43100000 |
| H | 2.01100000  | 0.64100000  | 0.40700000  |
| C | -2.37700000 | -0.81500000 | 1.15100000  |
| C | 4.04600000  | -1.42500000 | -1.40600000 |
| H | 4.54700000  | -2.38500000 | -1.31300000 |
| C | 1.36500000  | 2.77900000  | -0.70900000 |
| C | -2.62400000 | 1.51700000  | 0.56300000  |
| C | -1.80800000 | 0.45400000  | 0.98000000  |
| H | -0.75300000 | 0.61600000  | 1.16300000  |
| C | 2.74200000  | 1.05000000  | -1.59200000 |
| C | 0.00100000  | 2.48900000  | -0.68100000 |
| H | -0.43600000 | 1.86200000  | -1.45300000 |

|   |             |             |             |
|---|-------------|-------------|-------------|
| C | 1.16200000  | -1.23000000 | 3.77900000  |
| H | 1.32200000  | -0.99200000 | 4.82800000  |
| C | -3.74400000 | -1.03600000 | 0.92800000  |
| H | -4.16200000 | -2.02400000 | 1.09600000  |
| C | -0.77600000 | 3.02000000  | 0.35100000  |
| C | 3.52800000  | 0.60100000  | -2.66000000 |
| H | 3.63000000  | 1.22100000  | -3.54700000 |
| C | 1.95300000  | 3.58800000  | 0.26600000  |
| H | 3.01800000  | 3.79800000  | 0.21500000  |
| C | 4.17800000  | -0.63000000 | -2.55000000 |
| H | 4.79900000  | -0.97800000 | -3.37300000 |
| C | -4.54000000 | 0.04100000  | 0.52400000  |
| H | -5.60500000 | -0.11200000 | 0.36600000  |
| C | -3.99400000 | 1.31600000  | 0.31800000  |
| H | -4.61100000 | 2.15700000  | 0.01400000  |
| C | 1.15000000  | 4.11700000  | 1.28100000  |
| H | 1.59500000  | 4.75700000  | 2.04000000  |
| C | -0.21900000 | 3.83200000  | 1.33700000  |
| H | -0.85300000 | 4.23600000  | 2.12200000  |
| N | -2.53400000 | -0.52700000 | -2.05700000 |
| H | -1.69400000 | -0.87900000 | -1.54100000 |
| H | -2.22300000 | 0.04800000  | -2.84400000 |
| H | -3.08300000 | 0.07100000  | -1.41900000 |
| C | -3.37600000 | -1.68800000 | -2.54200000 |
| C | -4.62400000 | -1.18400000 | -3.25500000 |
| H | -3.61500000 | -2.26400000 | -1.64500000 |
| H | -2.73200000 | -2.28800000 | -3.19200000 |
| H | -5.22300000 | -2.03900000 | -3.58700000 |
| H | -5.24000000 | -0.57400000 | -2.58300000 |
| H | -4.36600000 | -0.58800000 | -4.14100000 |

Molecular Cartesian coordinates of the **[1+3]<sup>+</sup>** host-guest complex (Å)

|   |             |             |             |
|---|-------------|-------------|-------------|
| O | 3.19600000  | -1.96600000 | 0.88700000  |
| O | -1.42500000 | -1.15200000 | 2.17600000  |
| O | 0.94900000  | -3.46400000 | 0.02700000  |
| H | 0.62300000  | -3.82500000 | -0.81800000 |
| O | -0.53800000 | -1.87300000 | -0.50900000 |
| O | 2.34700000  | 1.50800000  | -2.42800000 |
| O | -1.46200000 | 3.20300000  | -0.01200000 |
| C | 2.23400000  | -1.51000000 | 1.75600000  |
| C | 0.84800000  | -1.60500000 | 1.46400000  |
| C | -0.05200000 | -1.06500000 | 2.40200000  |
| C | 0.34500000  | -2.28500000 | 0.23800000  |
| C | 3.20800000  | -1.47400000 | -0.41800000 |
| C | 0.38100000  | -0.50400000 | 3.60000000  |
| H | -0.35600000 | -0.12000000 | 4.30000000  |
| C | 2.67500000  | -0.94400000 | 2.95100000  |
| H | 3.74500000  | -0.88300000 | 3.13200000  |
| C | 2.72700000  | -0.19300000 | -0.71300000 |
| H | 2.32800000  | 0.44100000  | 0.07200000  |
| C | -2.05500000 | -0.04500000 | 1.65000000  |
| C | 3.76400000  | -2.29500000 | -1.39800000 |
| H | 4.13600000  | -3.27900000 | -1.13000000 |
| C | 1.82000000  | 2.35000000  | -1.45500000 |
| C | -2.06500000 | 2.10100000  | 0.53900000  |
| C | -1.35000000 | 1.03600000  | 1.10500000  |

|   |             |             |             |
|---|-------------|-------------|-------------|
| H | -0.26600000 | 1.04900000  | 1.11400000  |
| C | 2.79800000  | 0.25900000  | -2.03600000 |
| C | 0.44900000  | 2.30800000  | -1.20200000 |
| H | -0.18100000 | 1.60600000  | -1.74000000 |
| C | 1.75000000  | -0.45800000 | 3.87700000  |
| H | 2.09800000  | -0.02400000 | 4.81100000  |
| C | -3.45700000 | -0.07100000 | 1.65400000  |
| H | -3.97700000 | -0.91000000 | 2.10900000  |
| C | -0.08300000 | 3.18100000  | -0.25000000 |
| C | 3.34500000  | -0.54500000 | -3.04400000 |
| H | 3.39500000  | -0.16700000 | -4.06200000 |
| C | 2.65400000  | 3.24700000  | -0.78400000 |
| H | 3.71800000  | 3.25700000  | -1.00500000 |
| C | 3.82900000  | -1.81100000 | -2.71000000 |
| H | 4.26400000  | -2.43600000 | -3.48700000 |
| C | -4.14900000 | 1.00600000  | 1.09300000  |
| H | -5.23700000 | 1.00700000  | 1.10600000  |
| C | -3.47200000 | 2.08800000  | 0.51600000  |
| H | -4.00600000 | 2.93200000  | 0.08800000  |
| C | 2.09400000  | 4.11900000  | 0.15500000  |
| H | 2.73200000  | 4.82900000  | 0.67800000  |
| C | 0.72300000  | 4.08900000  | 0.43500000  |
| H | 0.27600000  | 4.76100000  | 1.16300000  |
| N | -2.67200000 | -0.47000000 | -1.48600000 |
| H | -1.81000000 | -0.82800000 | -1.01200000 |
| H | -2.42700000 | -0.16100000 | -2.43000000 |
| H | -3.02000000 | 0.34700000  | -0.96000000 |
| C | -3.73200000 | -1.54800000 | -1.53500000 |
| C | -5.01700000 | -1.02000000 | -2.16300000 |
| H | -3.88300000 | -1.85700000 | -0.49700000 |
| H | -3.30800000 | -2.38500000 | -2.09800000 |
| H | -5.36200000 | -0.14600000 | -1.59100000 |
| H | -4.81100000 | -0.67700000 | -3.18900000 |
| C | -6.10500000 | -2.10500000 | -2.18000000 |
| H | -6.33900000 | -2.44000000 | -1.16100000 |
| H | -7.02500000 | -1.71800000 | -2.63200000 |
| H | -5.78100000 | -2.97800000 | -2.76200000 |

Molecular Cartesian coordinates of the **[1+11]<sup>+</sup>** host-guest complex (Å)

|   |             |             |             |
|---|-------------|-------------|-------------|
| O | 3.98200000  | 0.93100000  | -1.64900000 |
| O | -0.06600000 | -1.65300000 | -2.43200000 |
| O | 1.61700000  | 1.88500000  | -2.89600000 |
| H | 1.06200000  | 2.68500000  | -2.84000000 |
| O | 0.00200000  | 1.12200000  | -1.53800000 |
| O | 2.07700000  | 1.57900000  | 2.79300000  |
| O | -0.84600000 | -2.22500000 | 2.34500000  |
| C | 3.31100000  | -0.24800000 | -1.87100000 |
| C | 1.90400000  | -0.29200000 | -2.05400000 |
| C | 1.31000000  | -1.55600000 | -2.22800000 |
| C | 1.07600000  | 0.94500000  | -2.10700000 |
| C | 3.58900000  | 1.73300000  | -0.57800000 |
| C | 2.06600000  | -2.72400000 | -2.27600000 |
| H | 1.56000000  | -3.67300000 | -2.43200000 |
| C | 4.07300000  | -1.41500000 | -1.91100000 |
| H | 5.14600000  | -1.33900000 | -1.75800000 |
| C | 3.00600000  | 1.17900000  | 0.56700000  |

|   |             |             |             |
|---|-------------|-------------|-------------|
| H | 2.84300000  | 0.10900000  | 0.63900000  |
| C | -0.85100000 | -1.96300000 | -1.34200000 |
| C | 3.84700000  | 3.09900000  | -0.68400000 |
| H | 4.31000000  | 3.49300000  | -1.58400000 |
| C | 1.85600000  | 0.21300000  | 2.92900000  |
| C | -1.23700000 | -2.22000000 | 1.03000000  |
| C | -0.36200000 | -1.93800000 | -0.02900000 |
| H | 0.67700000  | -1.70200000 | 0.16900000  |
| C | 2.66300000  | 2.03200000  | 1.62300000  |
| C | 0.62800000  | -0.31100000 | 2.52300000  |
| H | -0.12100000 | 0.34100000  | 2.08500000  |
| C | 3.45200000  | -2.64700000 | -2.13000000 |
| H | 4.05100000  | -3.55400000 | -2.16800000 |
| C | -2.19000000 | -2.27600000 | -1.61300000 |
| H | -2.53500000 | -2.31000000 | -2.64300000 |
| C | 0.39400000  | -1.67700000 | 2.69200000  |
| C | 2.90300000  | 3.40900000  | 1.54300000  |
| H | 2.63500000  | 4.04800000  | 2.38000000  |
| C | 2.83600000  | -0.59900000 | 3.50200000  |
| H | 3.78200000  | -0.16100000 | 3.80900000  |
| C | 3.50100000  | 3.92500000  | 0.39200000  |
| H | 3.70100000  | 4.99300000  | 0.32900000  |
| C | -3.04000000 | -2.56700000 | -0.54200000 |
| H | -4.07700000 | -2.83000000 | -0.73800000 |
| C | -2.58700000 | -2.52600000 | 0.78300000  |
| H | -3.24400000 | -2.75600000 | 1.61700000  |
| C | 2.57200000  | -1.96200000 | 3.67200000  |
| H | 3.32500000  | -2.60300000 | 4.12500000  |
| C | 1.35200000  | -2.51400000 | 3.26200000  |
| H | 1.13600000  | -3.57100000 | 3.38800000  |
| N | -2.32500000 | 0.67000000  | -0.16500000 |
| H | -1.36500000 | 0.63800000  | -0.57700000 |
| H | -2.31900000 | 1.26500000  | 0.66700000  |
| H | -2.59800000 | -0.28200000 | 0.12800000  |
| C | -3.32500000 | 1.21200000  | -1.18200000 |
| H | -3.28800000 | 0.51400000  | -2.02200000 |
| H | -2.93300000 | 2.18400000  | -1.49800000 |
| C | -4.69200000 | 1.31000000  | -0.56700000 |
| C | -5.04500000 | 2.44200000  | 0.18300000  |
| C | -5.60400000 | 0.25200000  | -0.69700000 |
| C | -6.29400000 | 2.51200000  | 0.80500000  |
| H | -4.35000000 | 3.27900000  | 0.26500000  |
| C | -6.85500000 | 0.32400000  | -0.07900000 |
| H | -5.33600000 | -0.62000000 | -1.29200000 |
| C | -7.19800000 | 1.45200000  | 0.67600000  |
| H | -6.56700000 | 3.39600000  | 1.37800000  |
| H | -7.56400000 | -0.49400000 | -0.19000000 |
| H | -8.17400000 | 1.50900000  | 1.15400000  |

Molecular Cartesian coordinates of the **[1+12]<sup>+</sup>** host-guest complex (Å)

|   |             |             |             |
|---|-------------|-------------|-------------|
| O | -1.75475600 | -3.67627500 | -0.23395800 |
| O | -3.75231000 | 0.74370800  | -0.59135100 |
| O | -2.13525200 | -2.27186100 | -2.62247200 |
| H | -1.63910400 | -2.07030200 | -3.43670600 |
| O | -1.46346800 | -0.18670100 | -2.14530300 |
| O | 2.31096300  | -1.35861800 | 1.13995900  |
| O | -0.06159800 | 2.79042300  | 1.84599400  |

|   |             |             |             |
|---|-------------|-------------|-------------|
| C | -2.58738300 | -2.67646100 | 0.20830300  |
| C | -2.72010400 | -1.45134700 | -0.49617100 |
| C | -3.56261600 | -0.47143200 | 0.06377600  |
| C | -2.03868600 | -1.21648200 | -1.80036800 |
| C | -0.38924800 | -3.41340100 | -0.32228500 |
| C | -4.28194000 | -0.70070000 | 1.23378800  |
| H | -4.93345900 | 0.08225500  | 1.61219200  |
| C | -3.29891400 | -2.90991100 | 1.38387600  |
| H | -3.15828200 | -3.85871800 | 1.89435700  |
| C | 0.22065400  | -2.43293800 | 0.47029600  |
| H | -0.36143900 | -1.83752700 | 1.16570500  |
| C | -3.02018300 | 1.82340900  | -0.14534400 |
| C | 0.34630600  | -4.21843900 | -1.19231200 |
| H | -0.16106500 | -4.97434900 | -1.78506400 |
| C | 1.62515000  | -0.48505700 | 1.97641400  |
| C | -1.16717900 | 2.82053300  | 1.04027100  |
| C | -1.90539400 | 1.68034700  | 0.69117800  |
| H | -1.60926500 | 0.70442000  | 1.05711500  |
| C | 1.60829000  | -2.27478700 | 0.38162500  |
| C | 1.02174000  | 0.65416300  | 1.43827600  |
| H | 1.02827700  | 0.82520300  | 0.36714000  |
| C | -4.15669900 | -1.92890100 | 1.88560400  |
| H | -4.71677400 | -2.11593000 | 2.79884400  |
| C | -3.42461500 | 3.08115900  | -0.61668900 |
| H | -4.31464700 | 3.16206400  | -1.23541300 |
| C | 0.44406500  | 1.57129300  | 2.31862300  |
| C | 2.37581200  | -3.07529200 | -0.47445900 |
| H | 3.45425200  | -2.94450400 | -0.50034800 |
| C | 1.64133600  | -0.72201500 | 3.35133300  |
| H | 2.13033400  | -1.61441200 | 3.73266700  |
| C | 1.73294500  | -4.04084300 | -1.25150100 |
| H | 2.32373800  | -4.67248300 | -1.91163500 |
| C | -2.68023500 | 4.20551900  | -0.24483900 |
| H | -2.99385600 | 5.19064800  | -0.58464500 |
| C | -1.54009500 | 4.09070200  | 0.55998600  |
| H | -0.96712100 | 4.96318600  | 0.86264500  |
| C | 1.04651200  | 0.20986800  | 4.20716100  |
| H | 1.06100100  | 0.04118400  | 5.28135700  |
| C | 0.44210400  | 1.36388700  | 3.69716500  |
| H | -0.00850500 | 2.10607000  | 4.35075500  |
| N | -0.82388400 | 2.48467300  | -2.27244300 |
| H | -1.60996300 | 2.90389800  | -2.77639900 |
| H | -1.06004800 | 1.47868200  | -2.09863400 |
| H | -0.77938200 | 2.95812100  | -1.35651400 |
| C | 0.48816500  | 2.63258300  | -3.02462500 |
| H | 0.64730400  | 3.70555800  | -3.17129600 |
| H | 0.34504100  | 2.14994600  | -3.99567500 |
| C | 1.60813700  | 1.99733500  | -2.24353600 |
| C | 1.94107300  | 0.65388000  | -2.47081700 |
| C | 2.30752900  | 2.73633600  | -1.27708800 |
| C | 2.97484600  | 0.05338400  | -1.75546000 |
| H | 1.39550400  | 0.07681800  | -3.21444800 |
| C | 3.32465000  | 2.13755000  | -0.53257100 |
| H | 2.06138000  | 3.78289900  | -1.10345100 |
| C | 3.64452300  | 0.80456800  | -0.79076800 |
| H | 3.25039300  | -0.98129700 | -1.92337900 |
| H | 3.86538700  | 2.68341600  | 0.23405600  |
| N | 4.72877500  | 0.15125300  | 0.00464300  |



|   |            |             |             |
|---|------------|-------------|-------------|
| O | 5.08936700 | 0.71968900  | 1.03155500  |
| O | 5.17865300 | -0.90878600 | -0.42463600 |

## References

- 1 <http://supramolecular.org>
- 2 D. B. Hibbert and P. Thordarson, *Chem. Commun.*, **2016**, 52, 12792-12805.
- 3 A. Peterson, M-L. Ludvig, J. Martõnova, S. Kaabel, P. Kerner, M. Uudsemaa, A. Trummal, M. Fomitšenko, T. Pehk, R. Aav, J. Adamson, *Supramolecular Chemistry*, **2020**, 32, 313–319.
- 4 S. Grimme, *J. Comp. Chem.*, **2006**, 27, 1787-1799.
- 5 A. D. McLean and G. S. Chandler, *J. Chem. Phys.*, **1980**, 72, 5639–5648.
- 6 M. J. Frisch, J. A. Pople and J. S. Binkley, *J. Chem. Phys.*, **1984**, 80, 3265–3269.
- 7 M. J. Frisch, G. W. Trucks, H. B. Schlegel, G. E. Scuseria, M. A. Robb, J. R. Cheeseman, G. Scalmani, V. Barone, B. Mennucci and G. A. Petersson, *Gaussian 09, Revis. B.01.*, Gaussian Inc., Wallingford, CT, USA, **2009**.
